# Supplementary material for: Double diastereoselection in anti aldol reactions mediated by dicyclohexylchloroborane between an l-erythrulose derivative and chiral aldehydes
Source: Royal Society of Chemistry journal article supplement (doi:10.1039/c2ob25803j), 2012-01-01

# Double Diastereoselection in *Anti* Aldol Reactions Mediated by Dicyclohexylchloroborane between An L-Erythrulose Derivative and Chiral Aldehydes

Santiago Díaz-Oltra,<sup>a</sup> Purificación Ruiz,<sup>a</sup> Eva Falomir,<sup>a</sup> Juan Murga,<sup>a</sup> Miguel Carda,<sup>a</sup> and J. Alberto Marco<sup>b</sup>

<sup>a</sup>*Departamento de Química Inorgánica y Orgánica, Universidad Jaume I, E-12071 Castellón, Spain; and* <sup>b</sup>*Departamento de Química Orgánica, Universidad de Valencia, E-46100 Burjassot, Valencia, Spain*

## *Supporting Information*

### *Contents:*

*S-2/S-31: <sup>1</sup>H and <sup>13</sup>C NMR spectra of aldols 17-20 and intermediates 21-25*

### NMR Spectra of new compounds

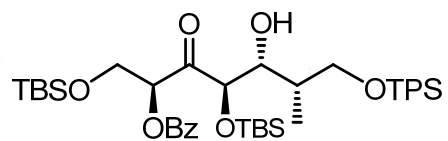

**17a**

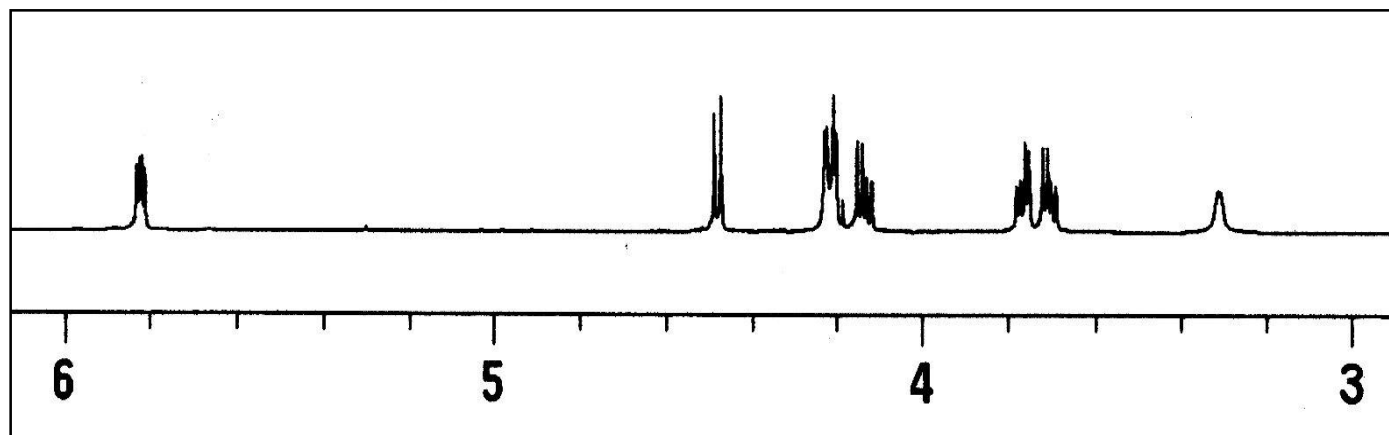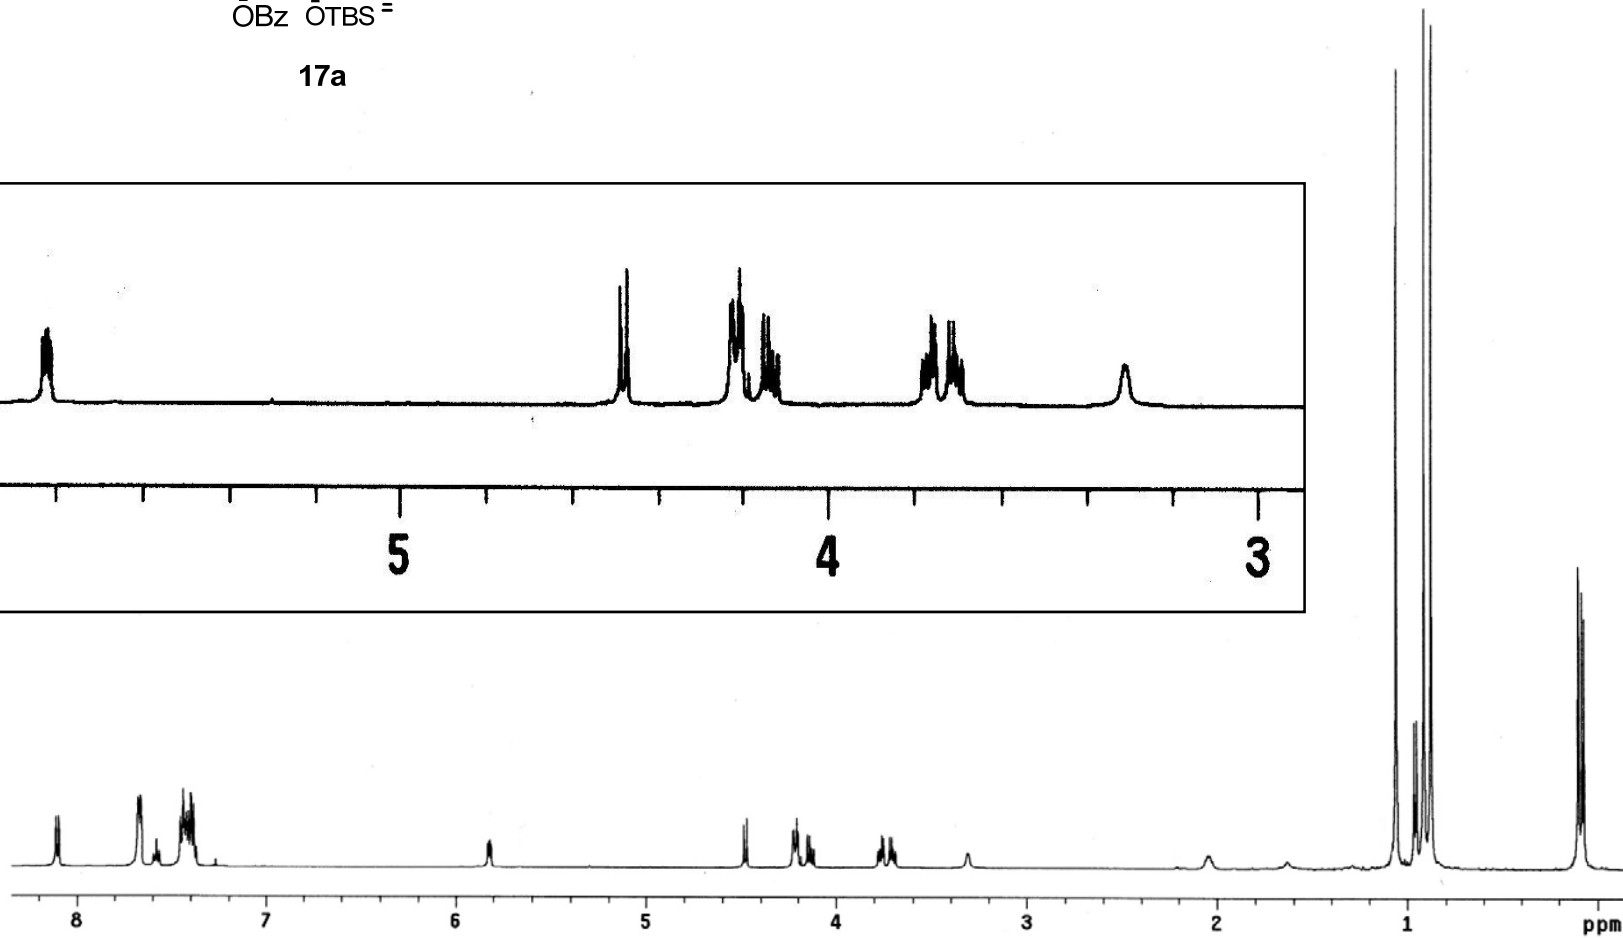

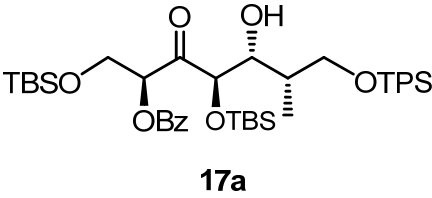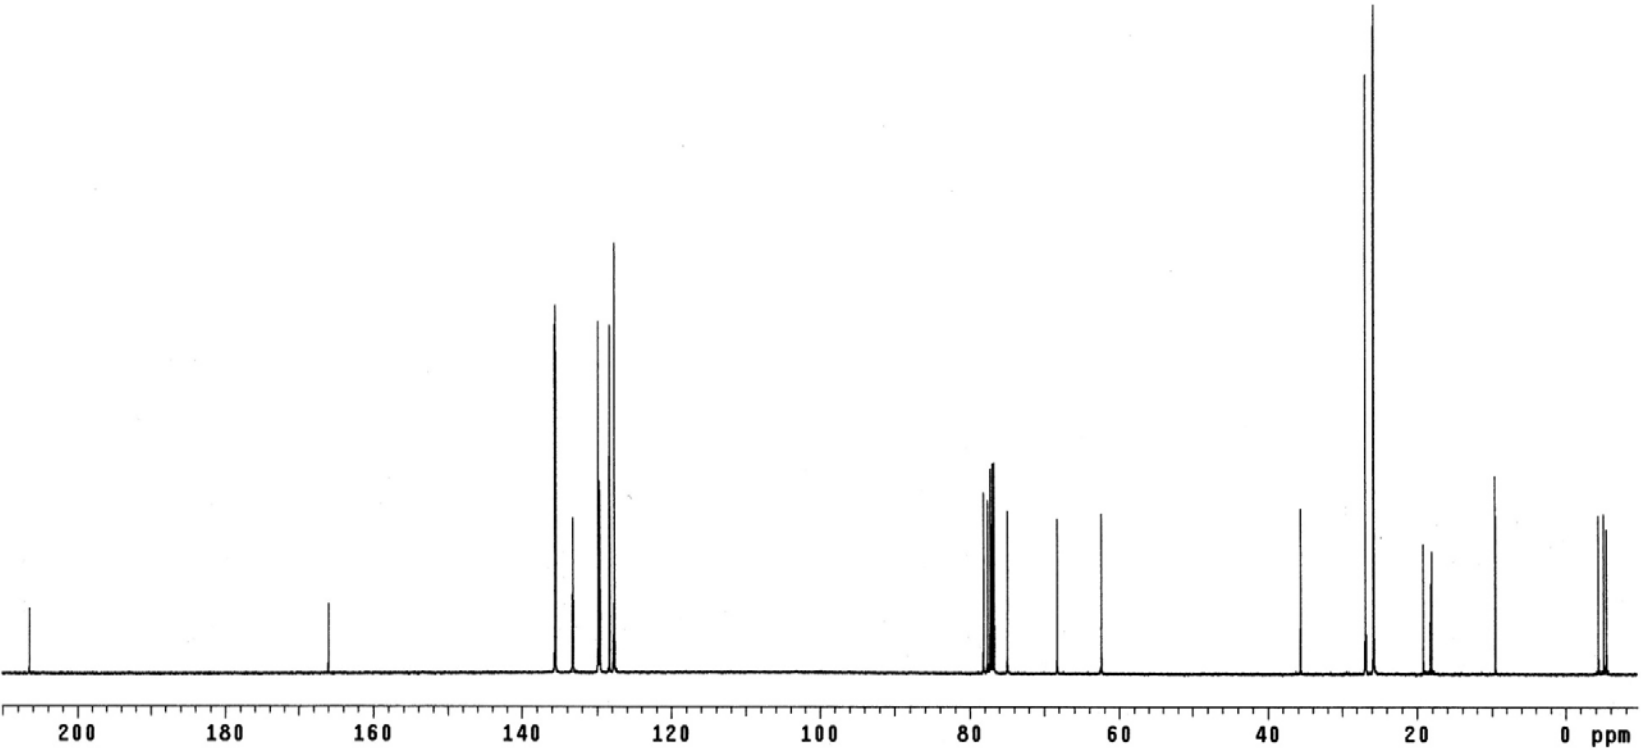

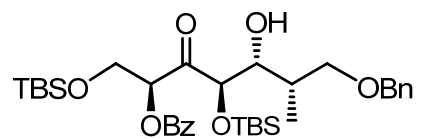

**17b**

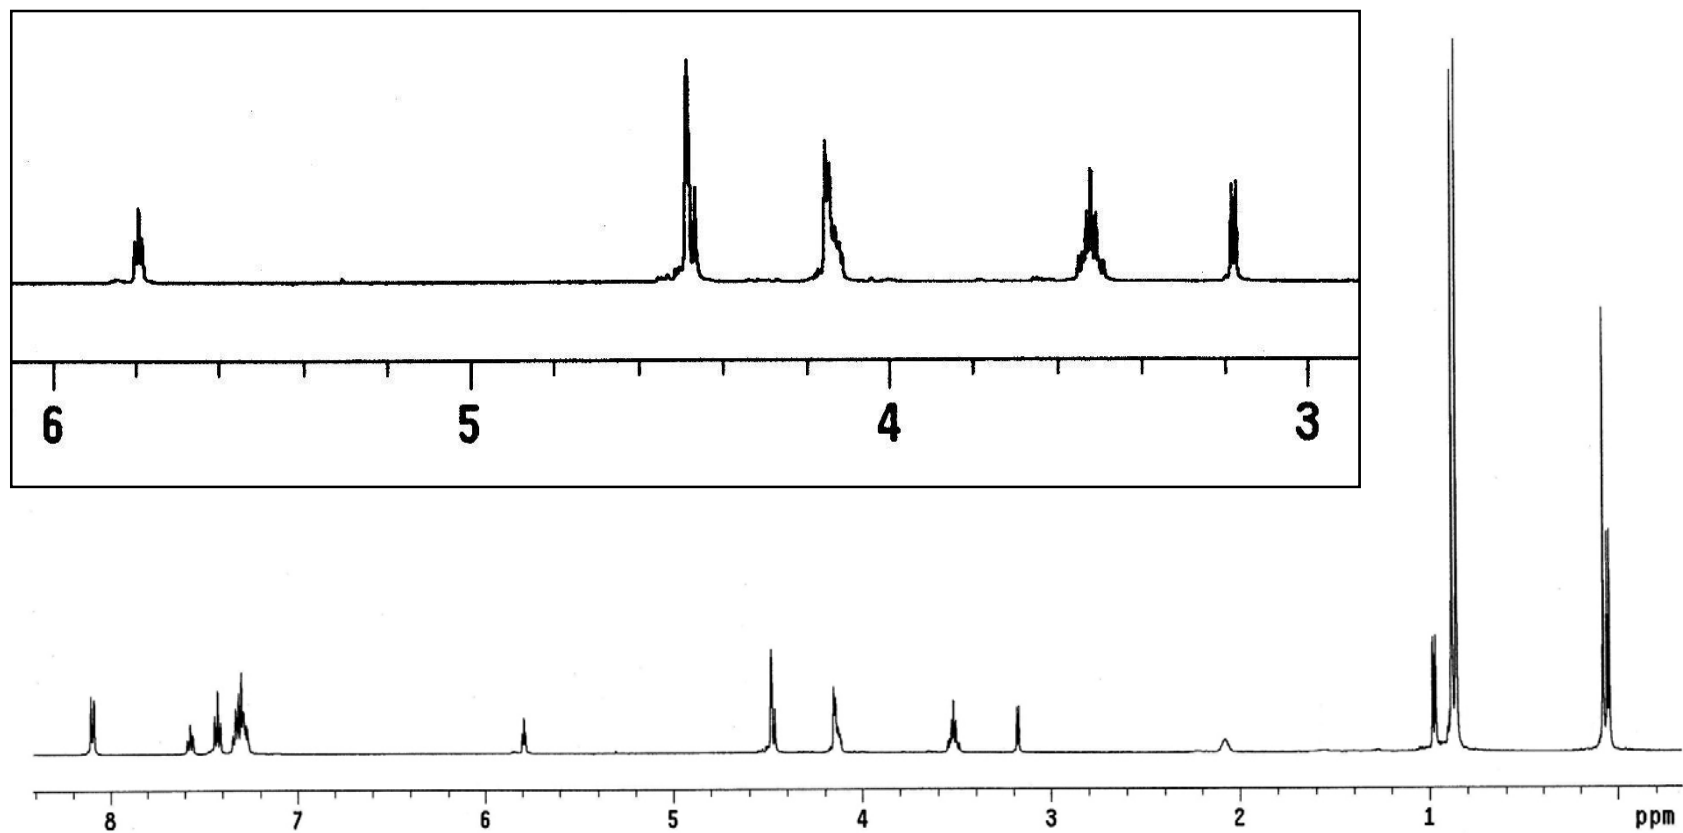

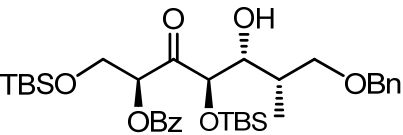

**17b**

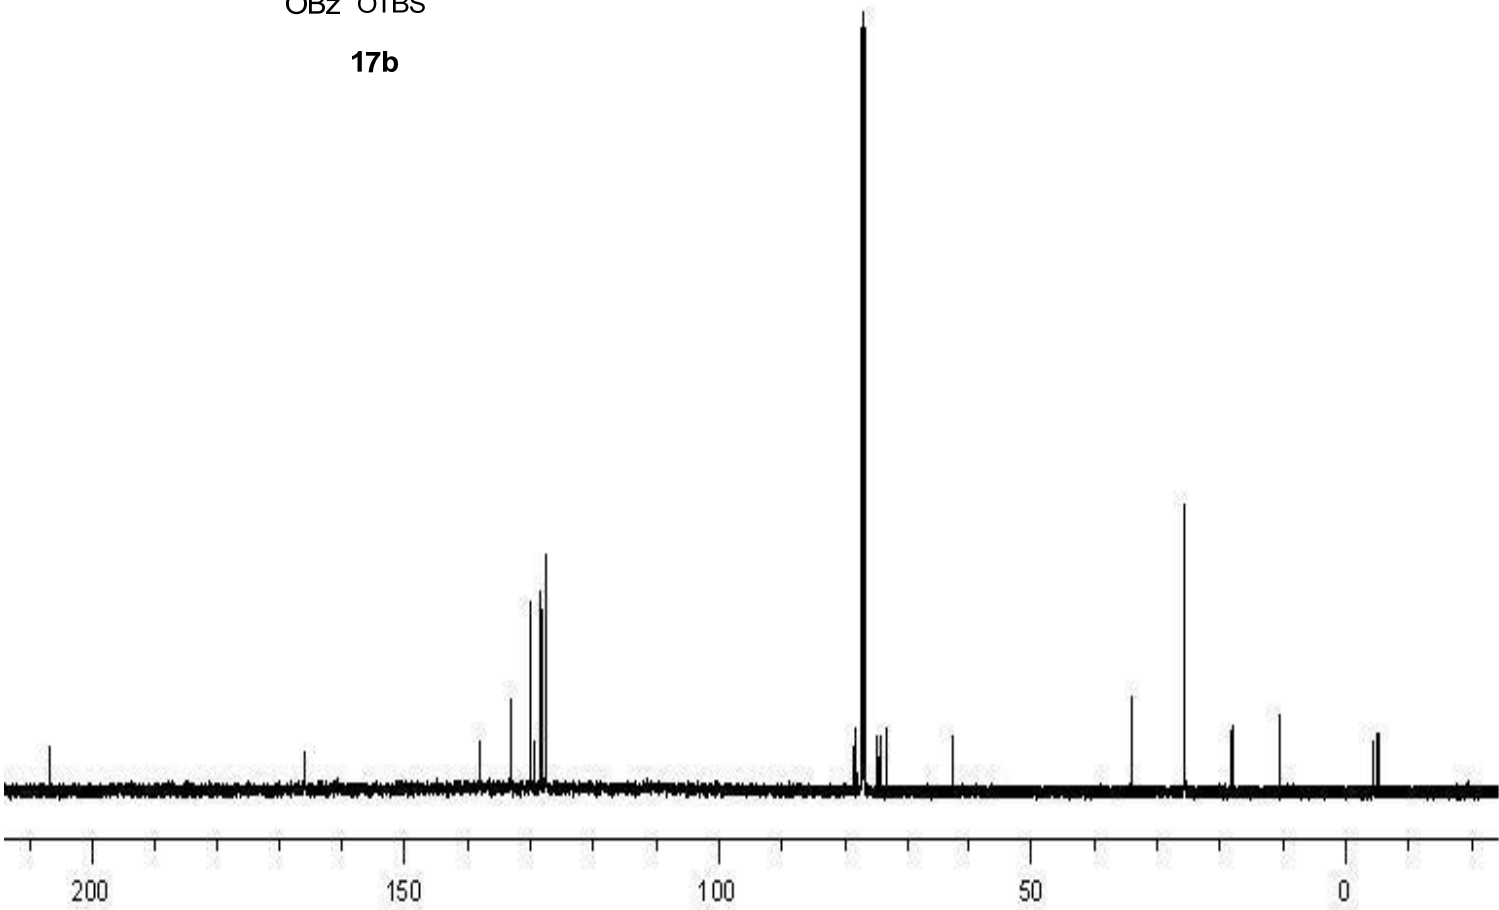

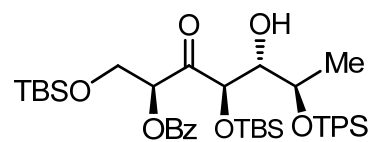

**18a**

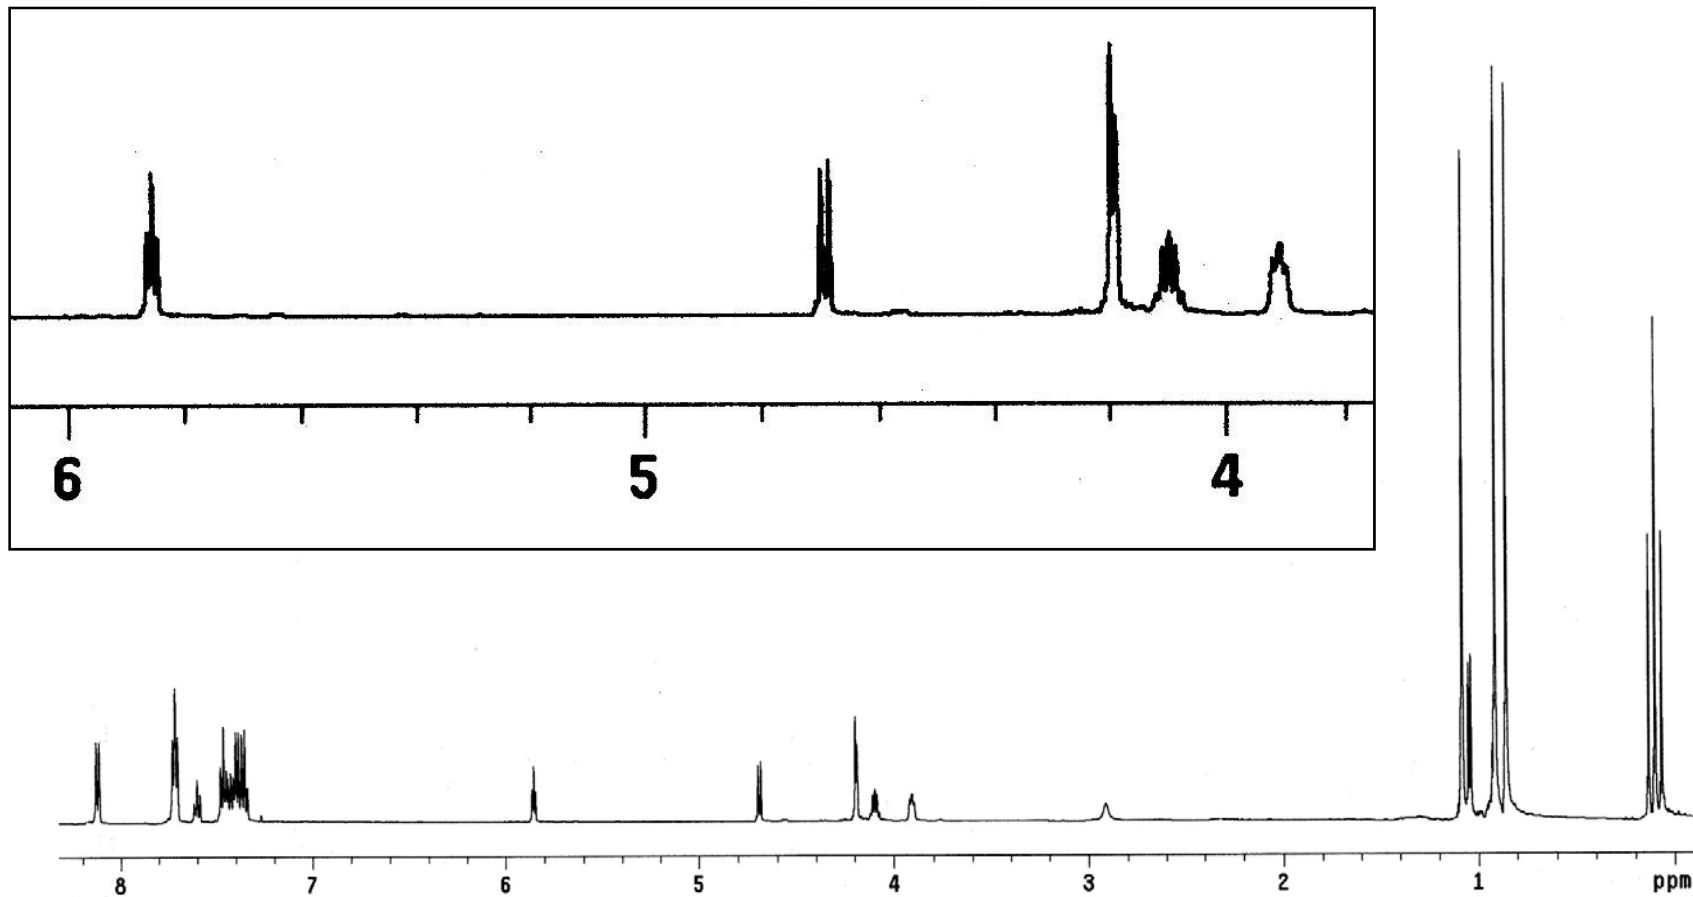

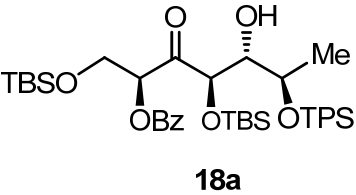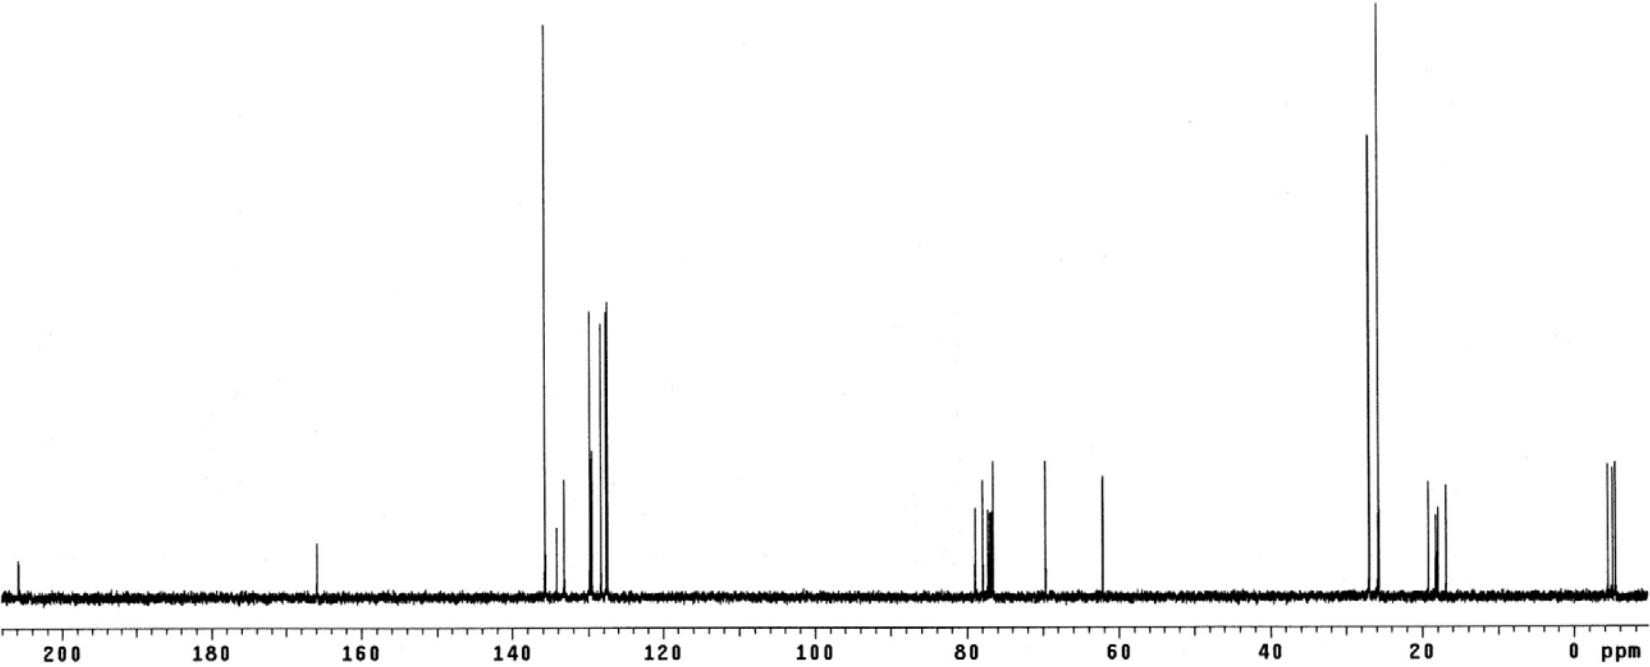

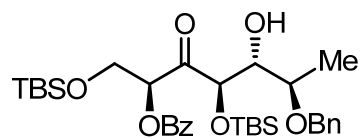

**18b**

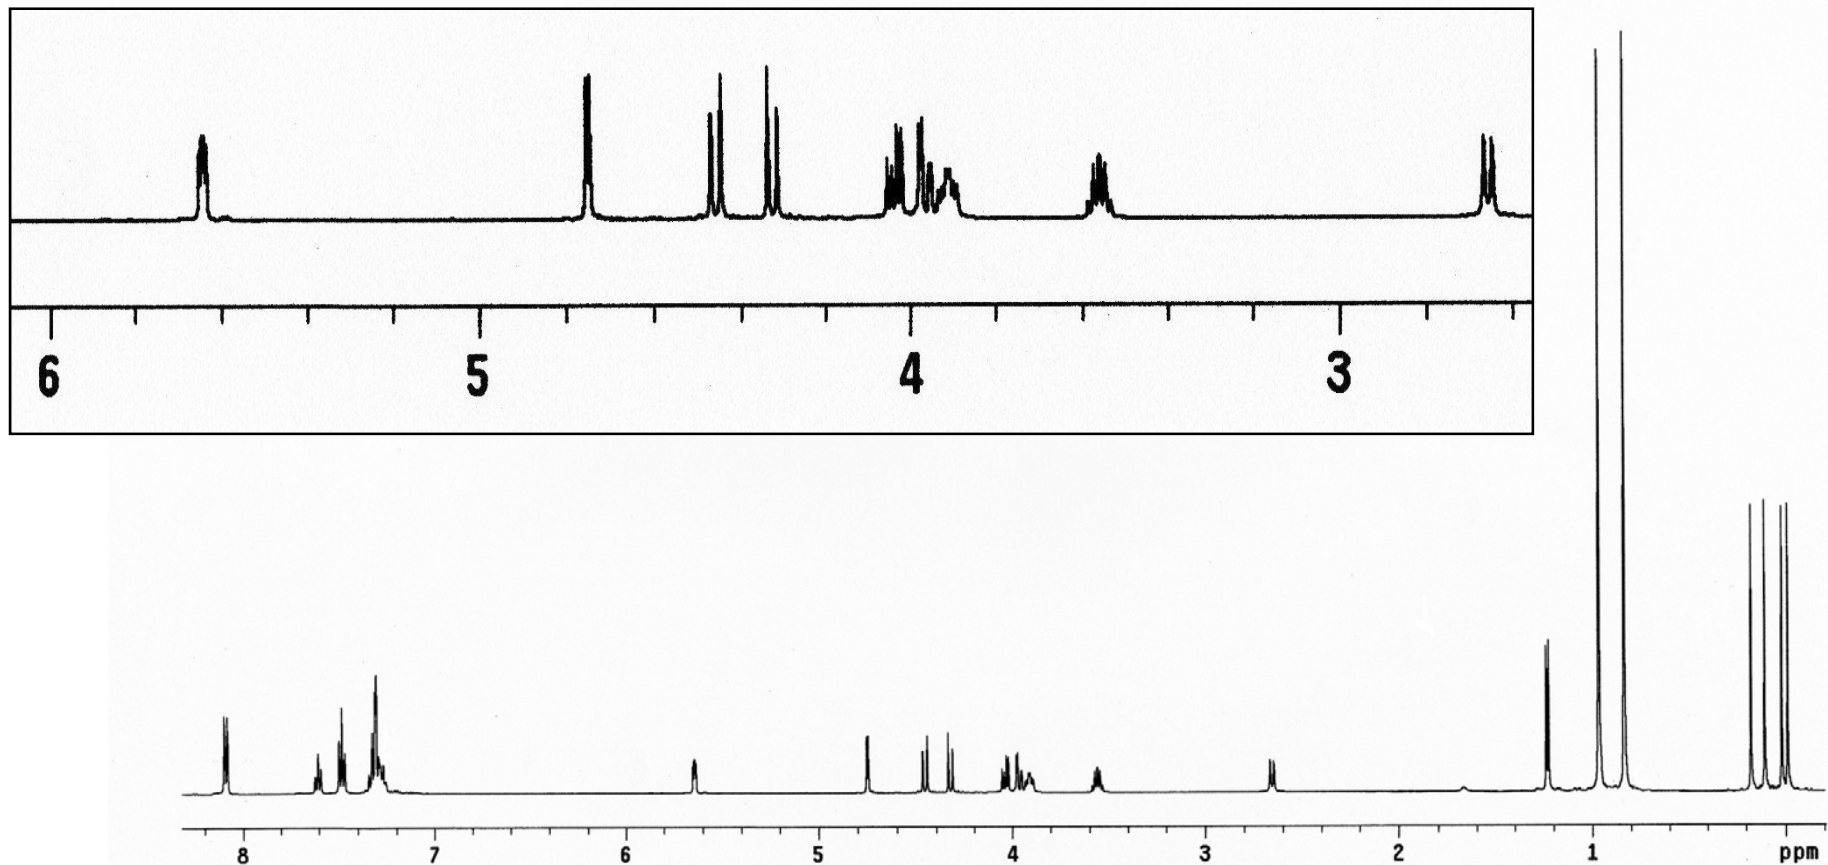



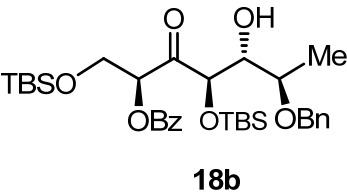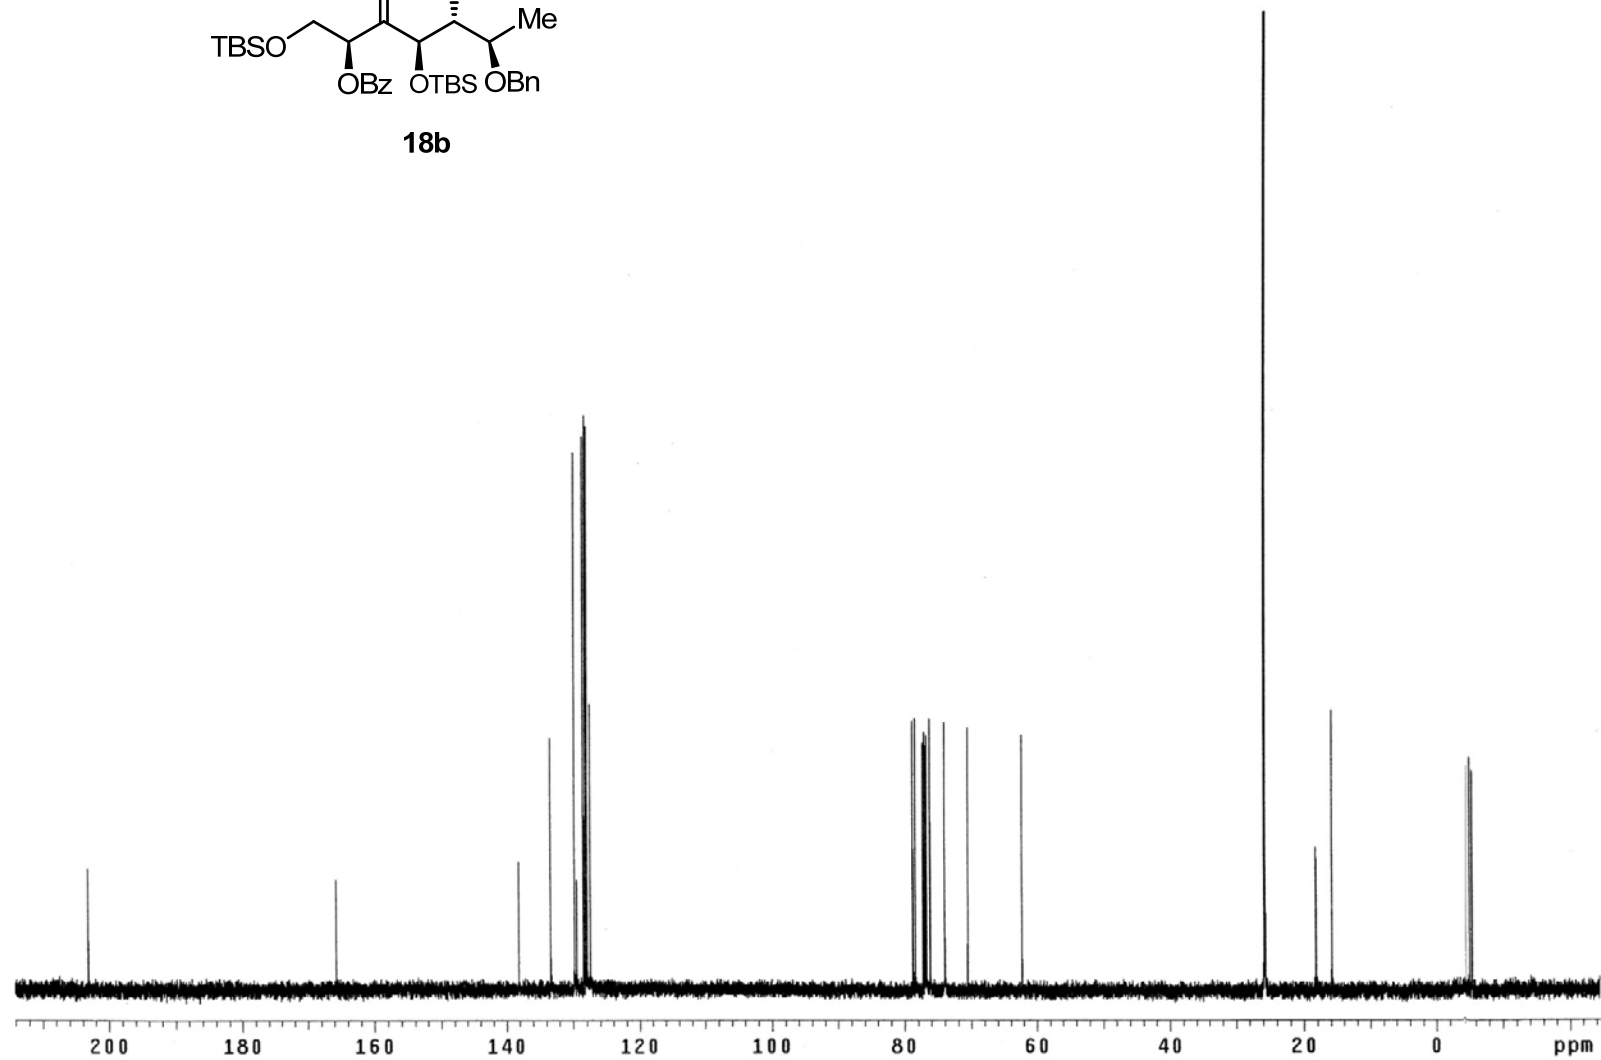

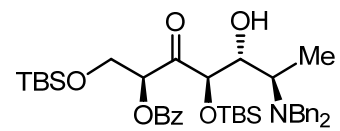

**19a**

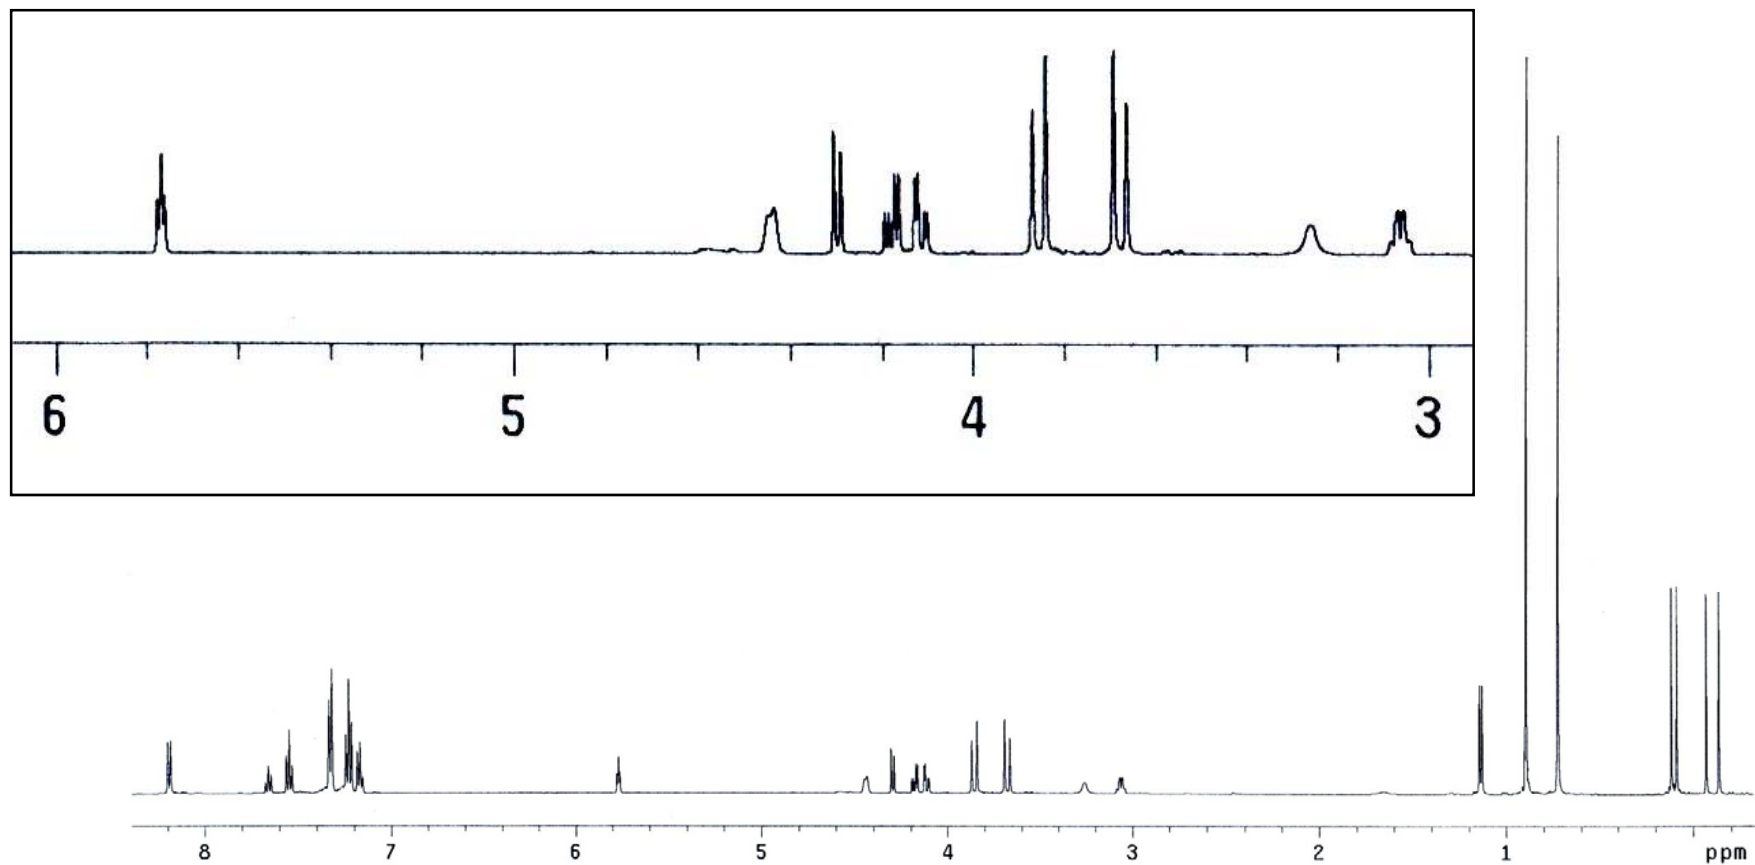

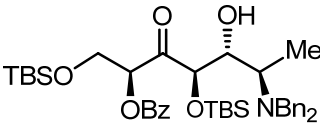

**19a**

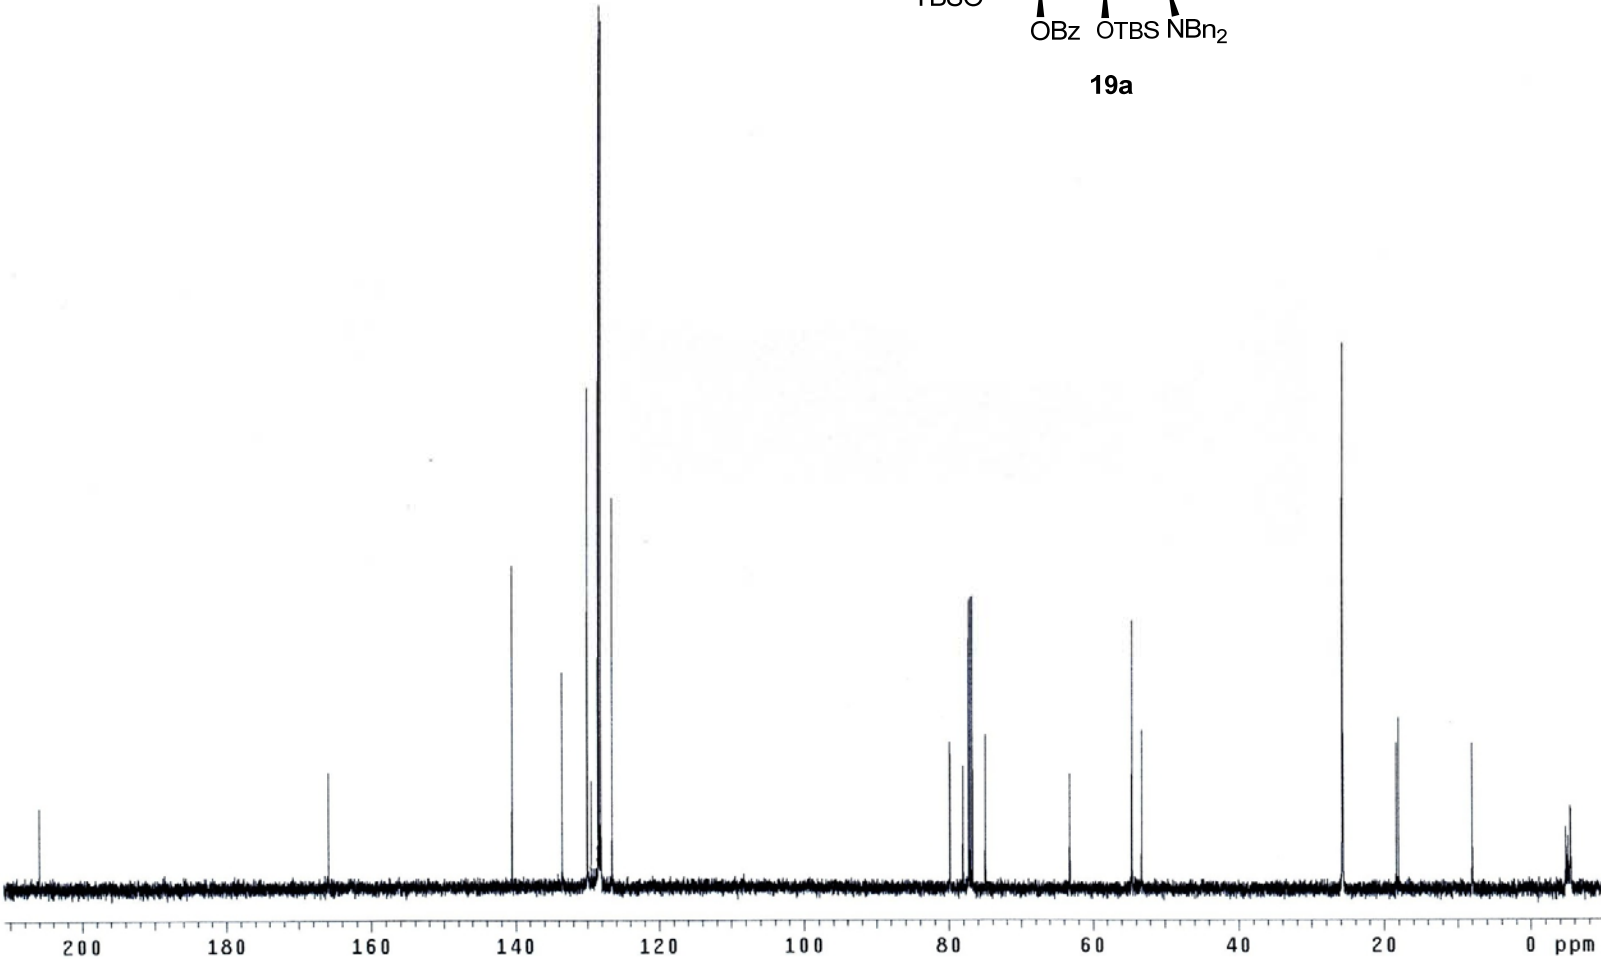

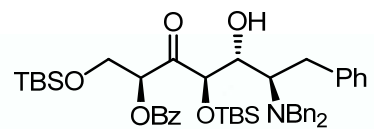

**19b**

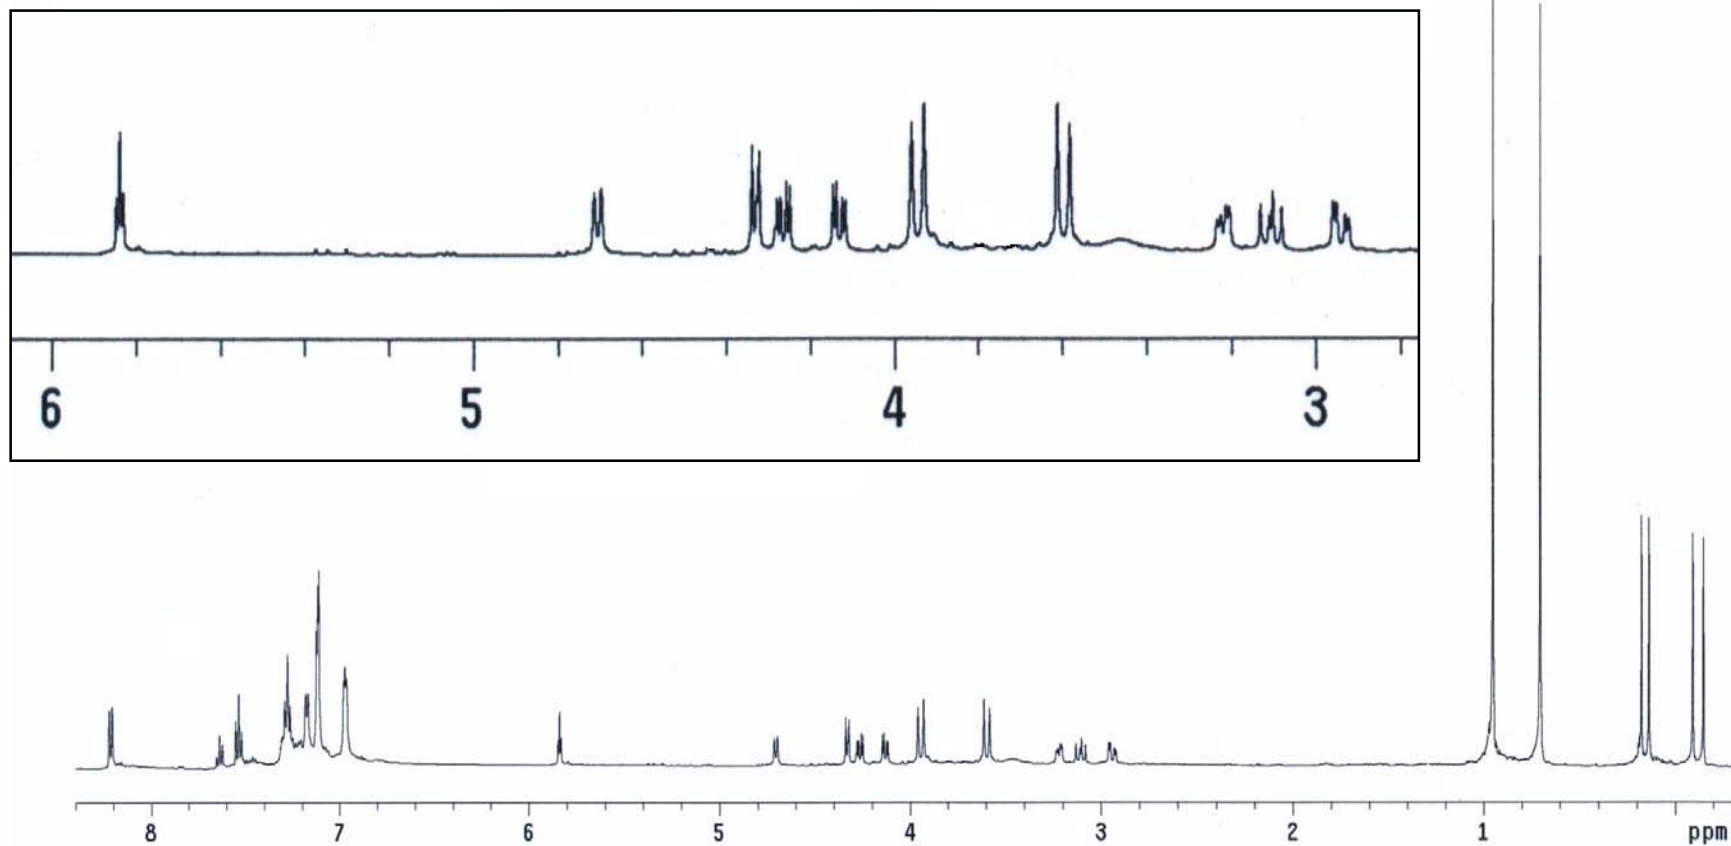

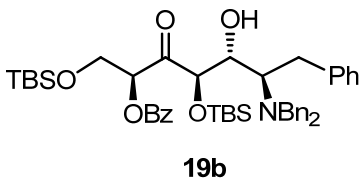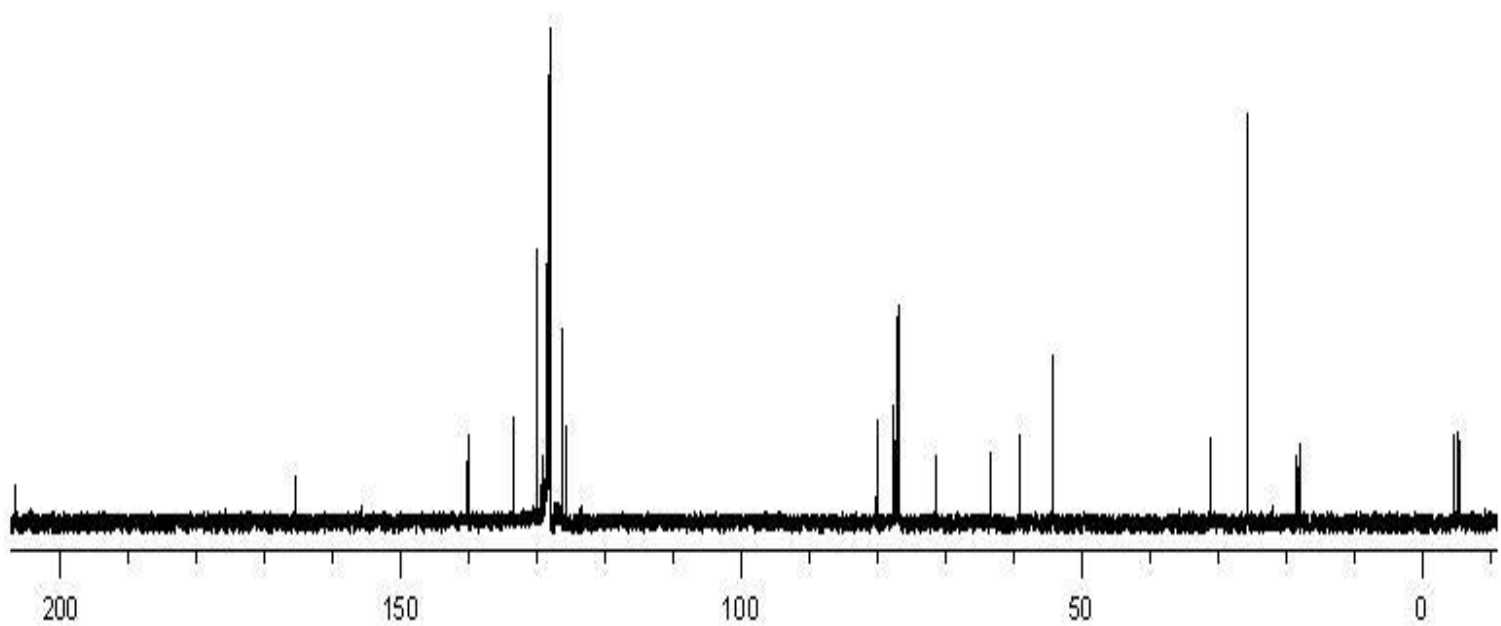

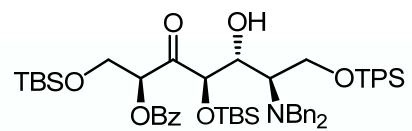

**19c**

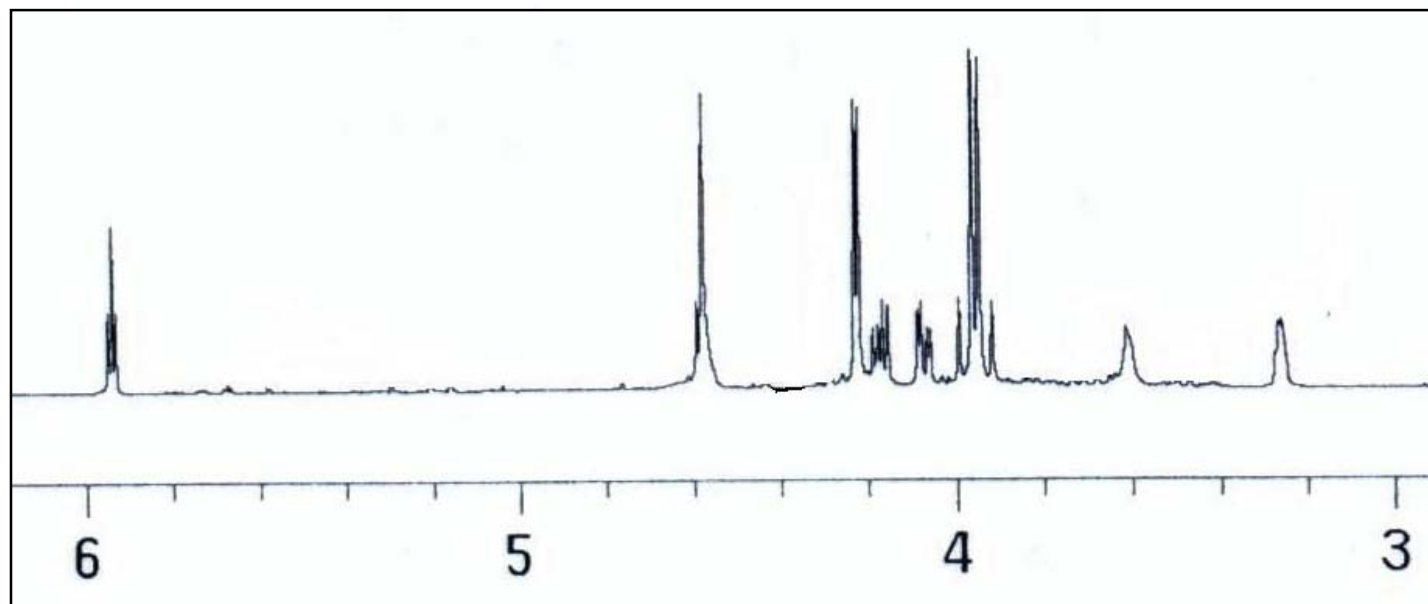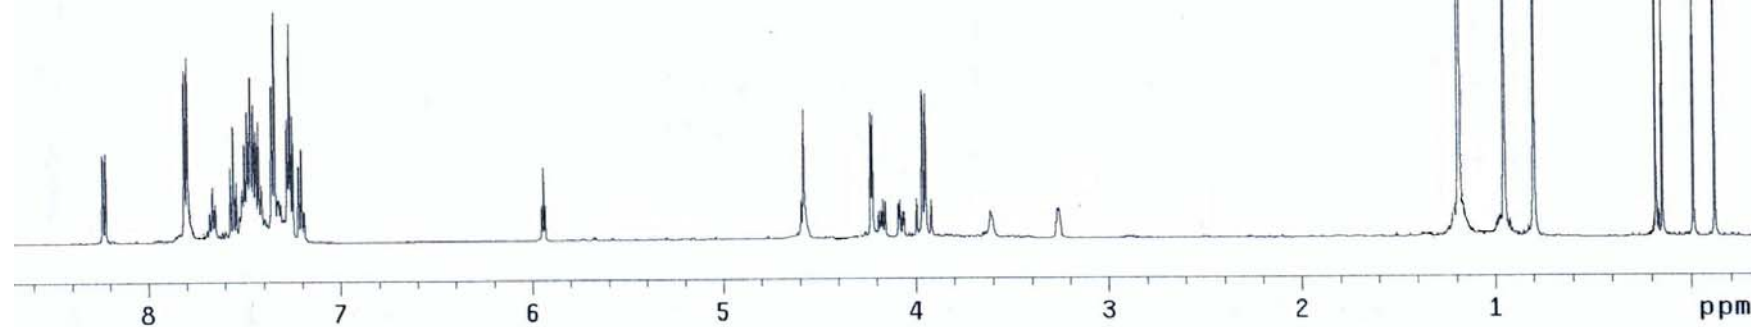

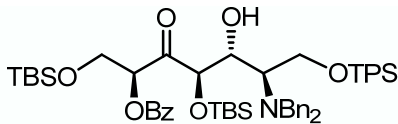

**19c**

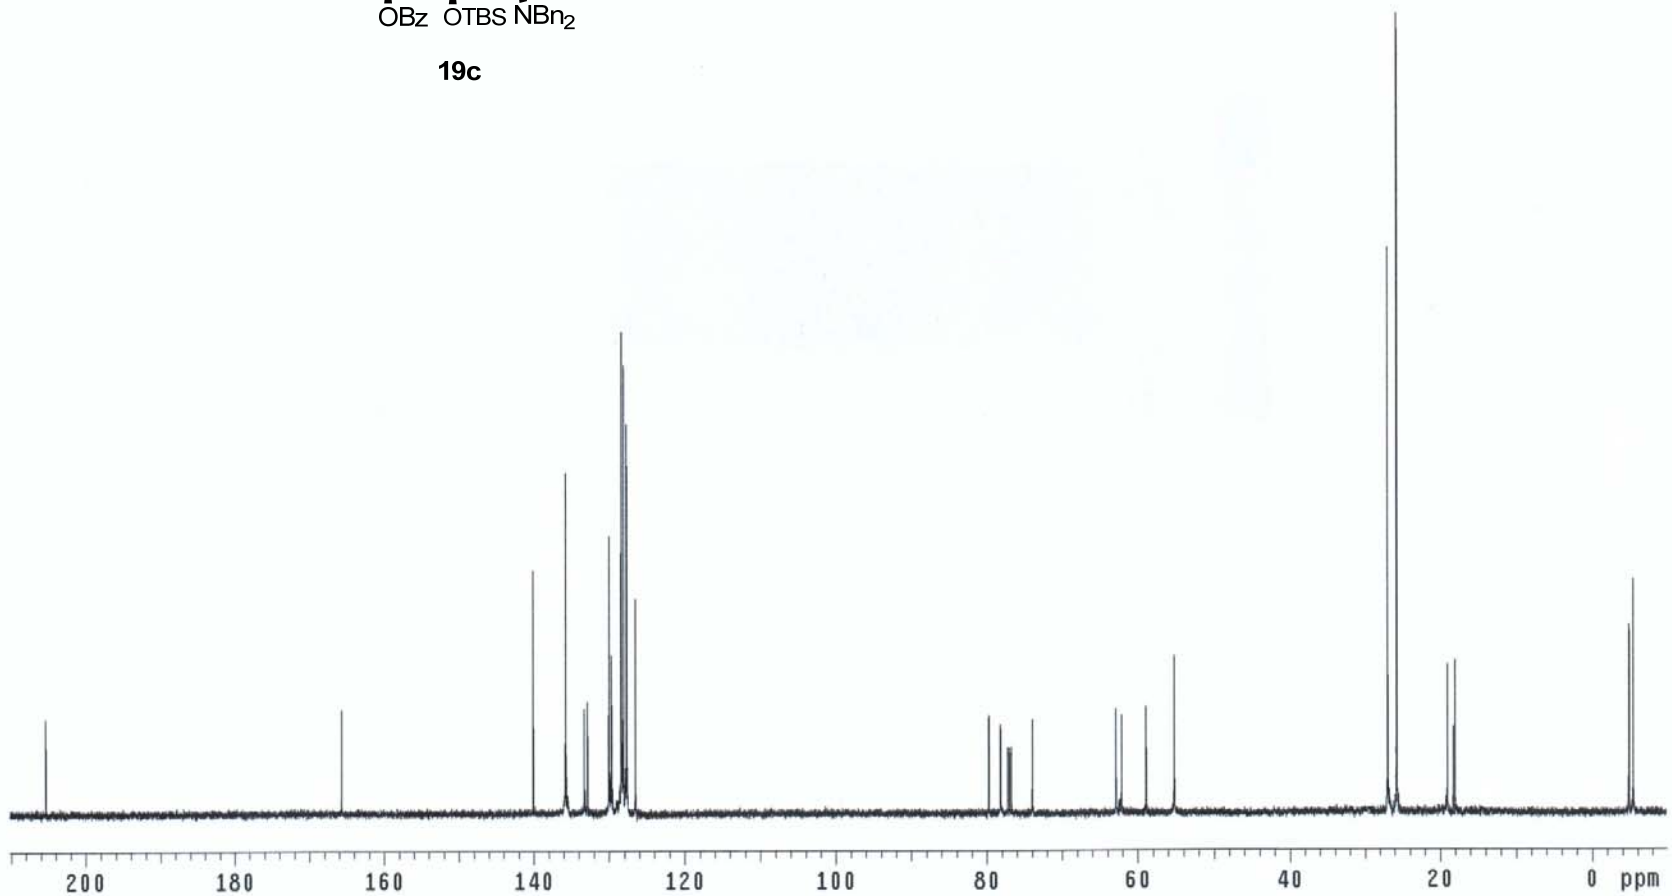

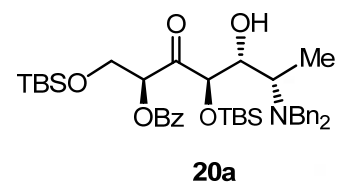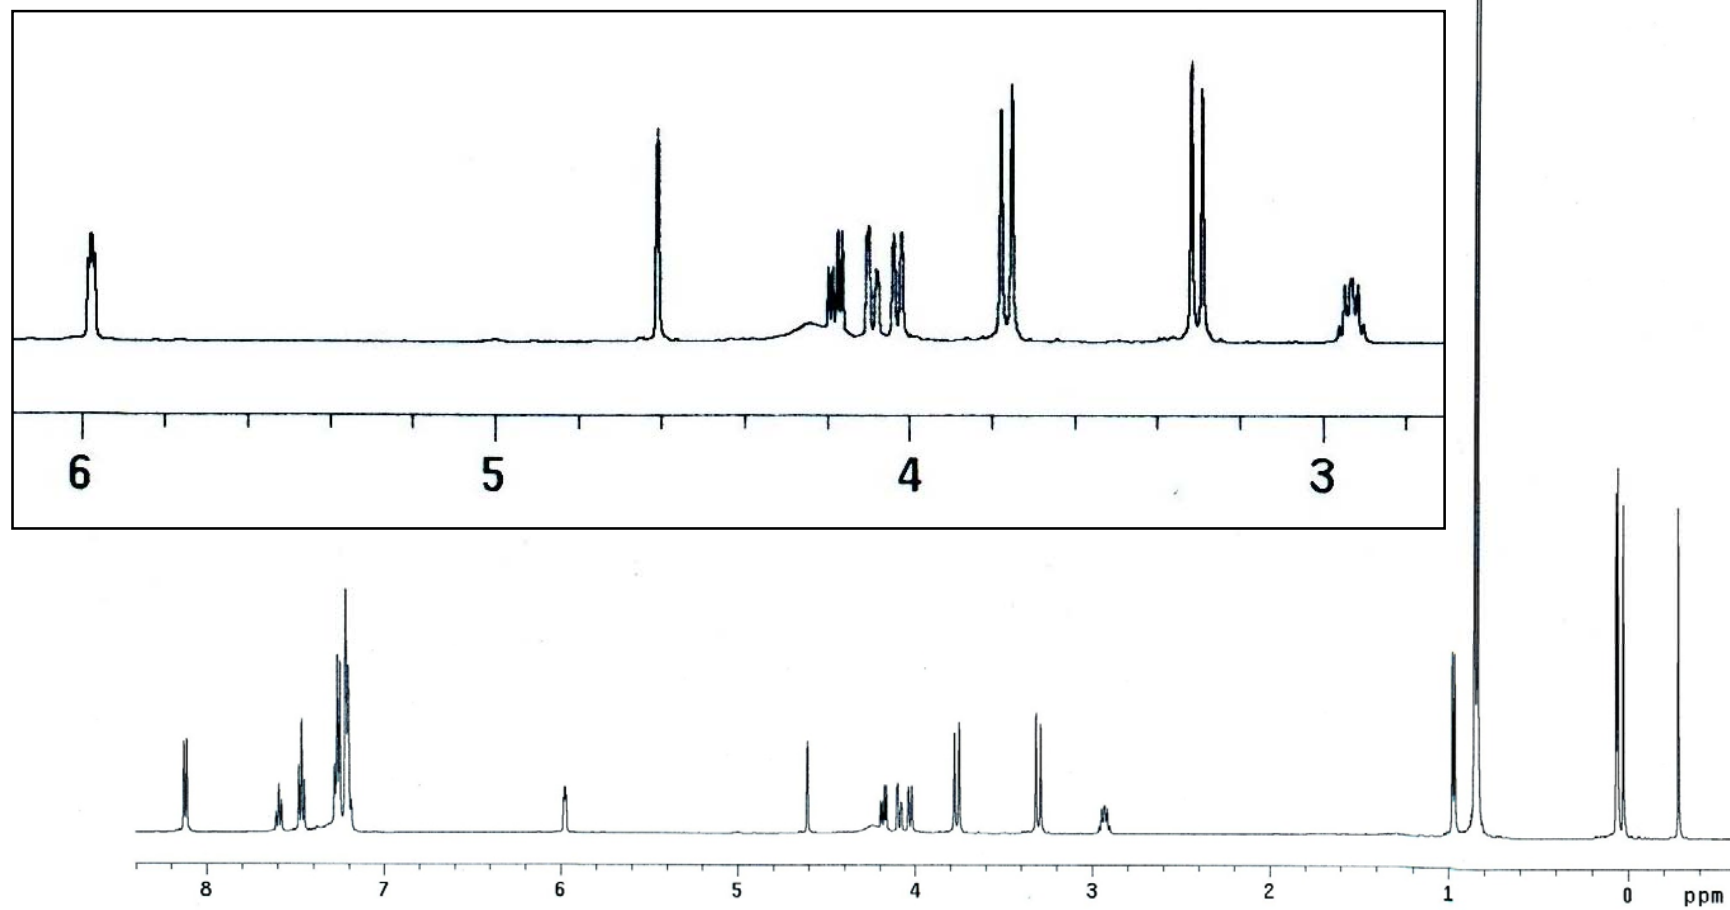



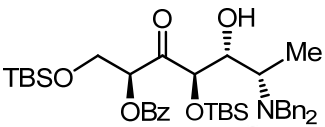

20a

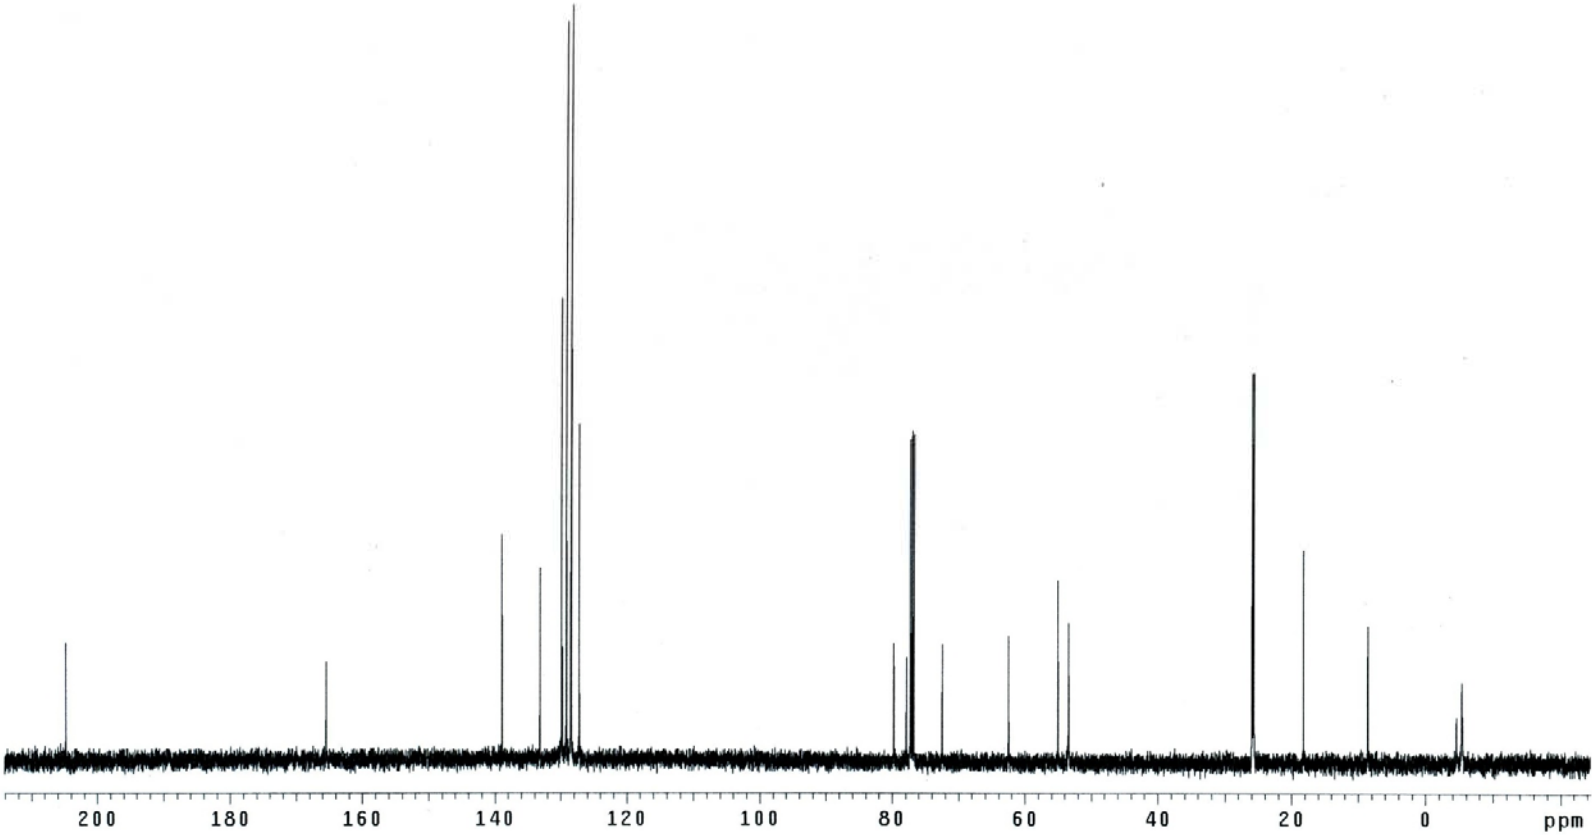

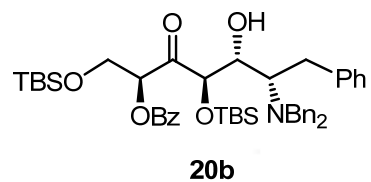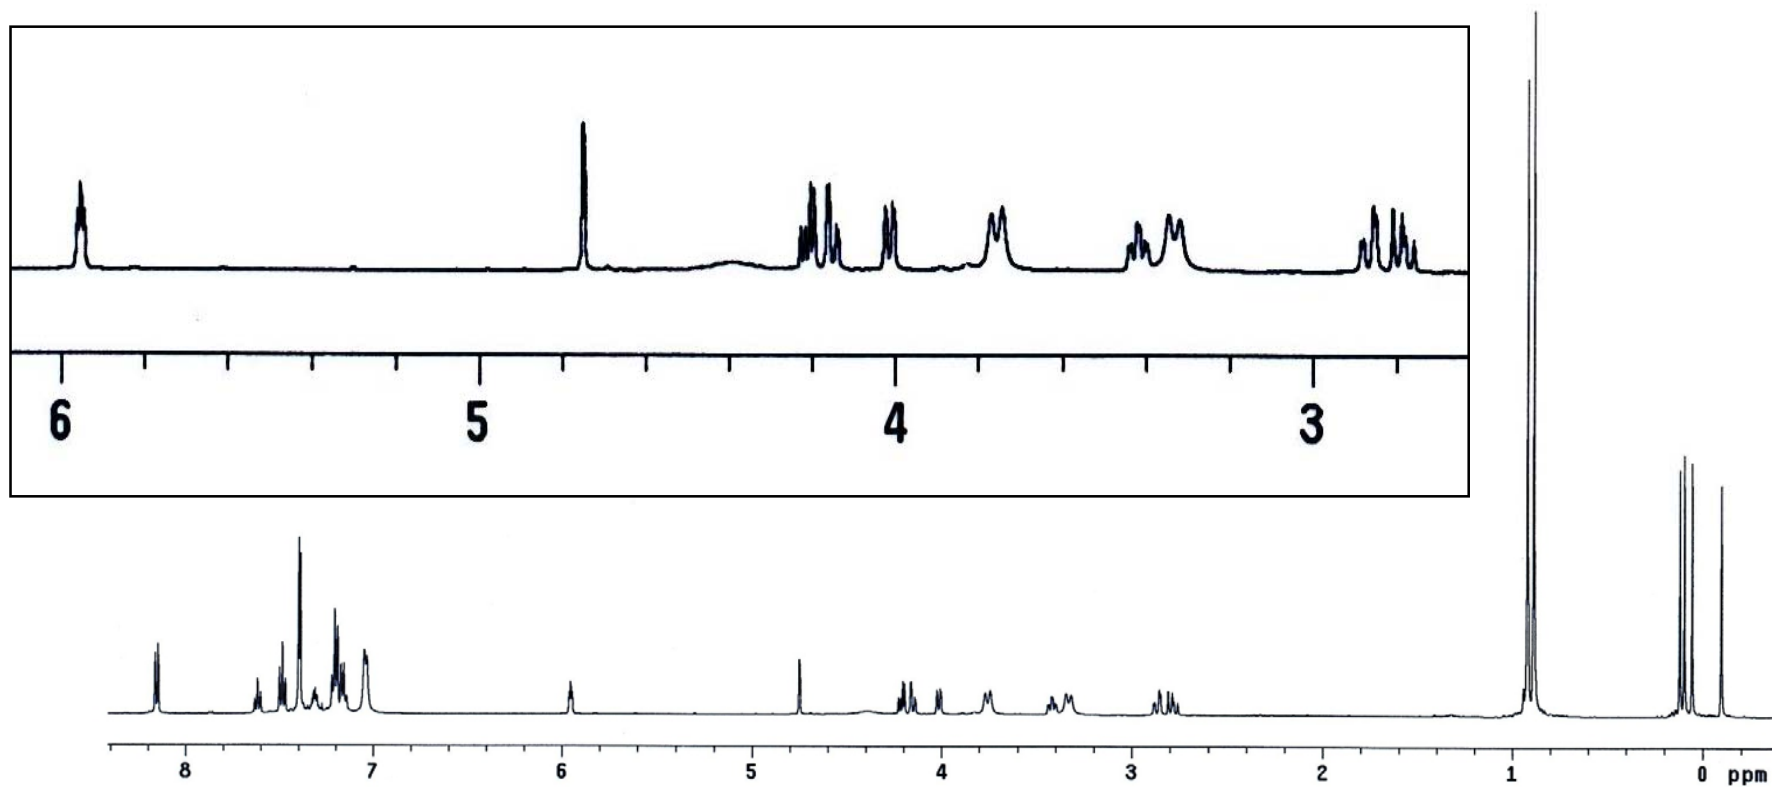

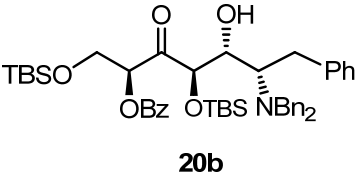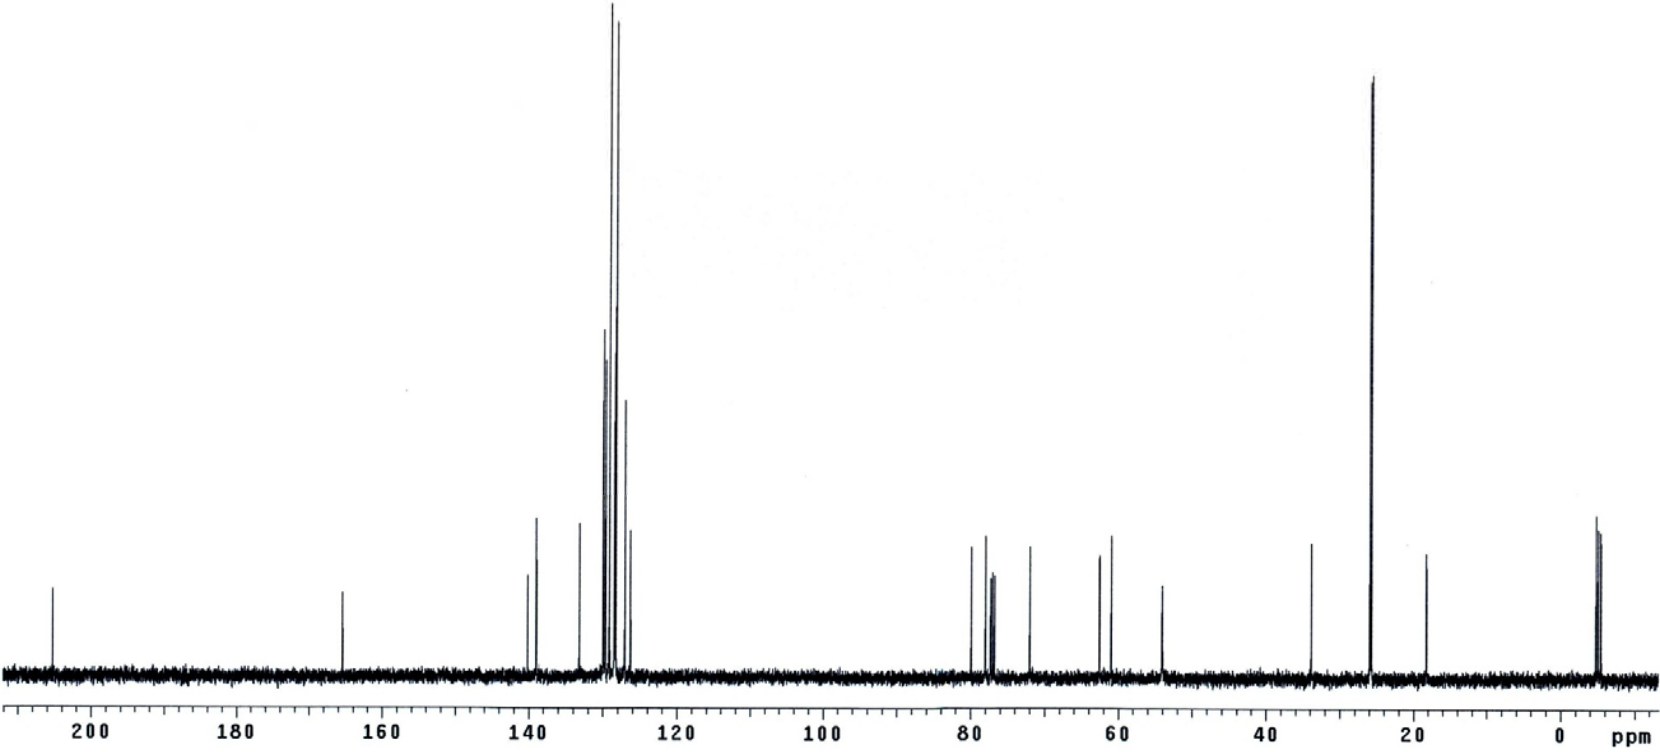

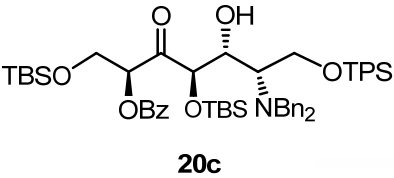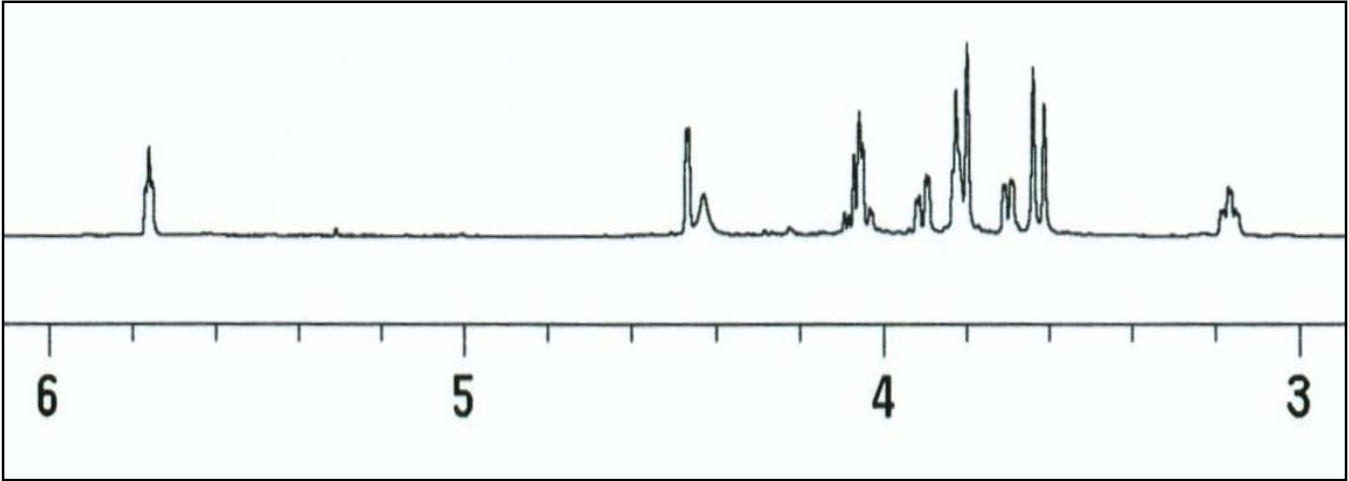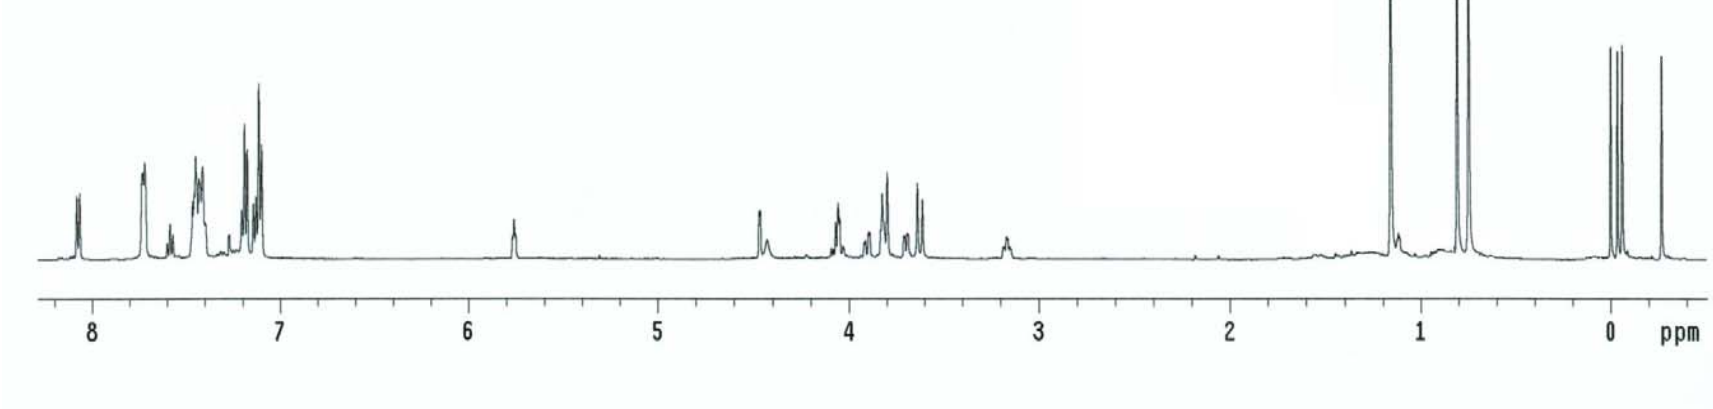

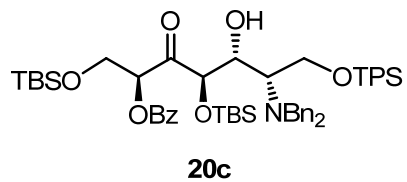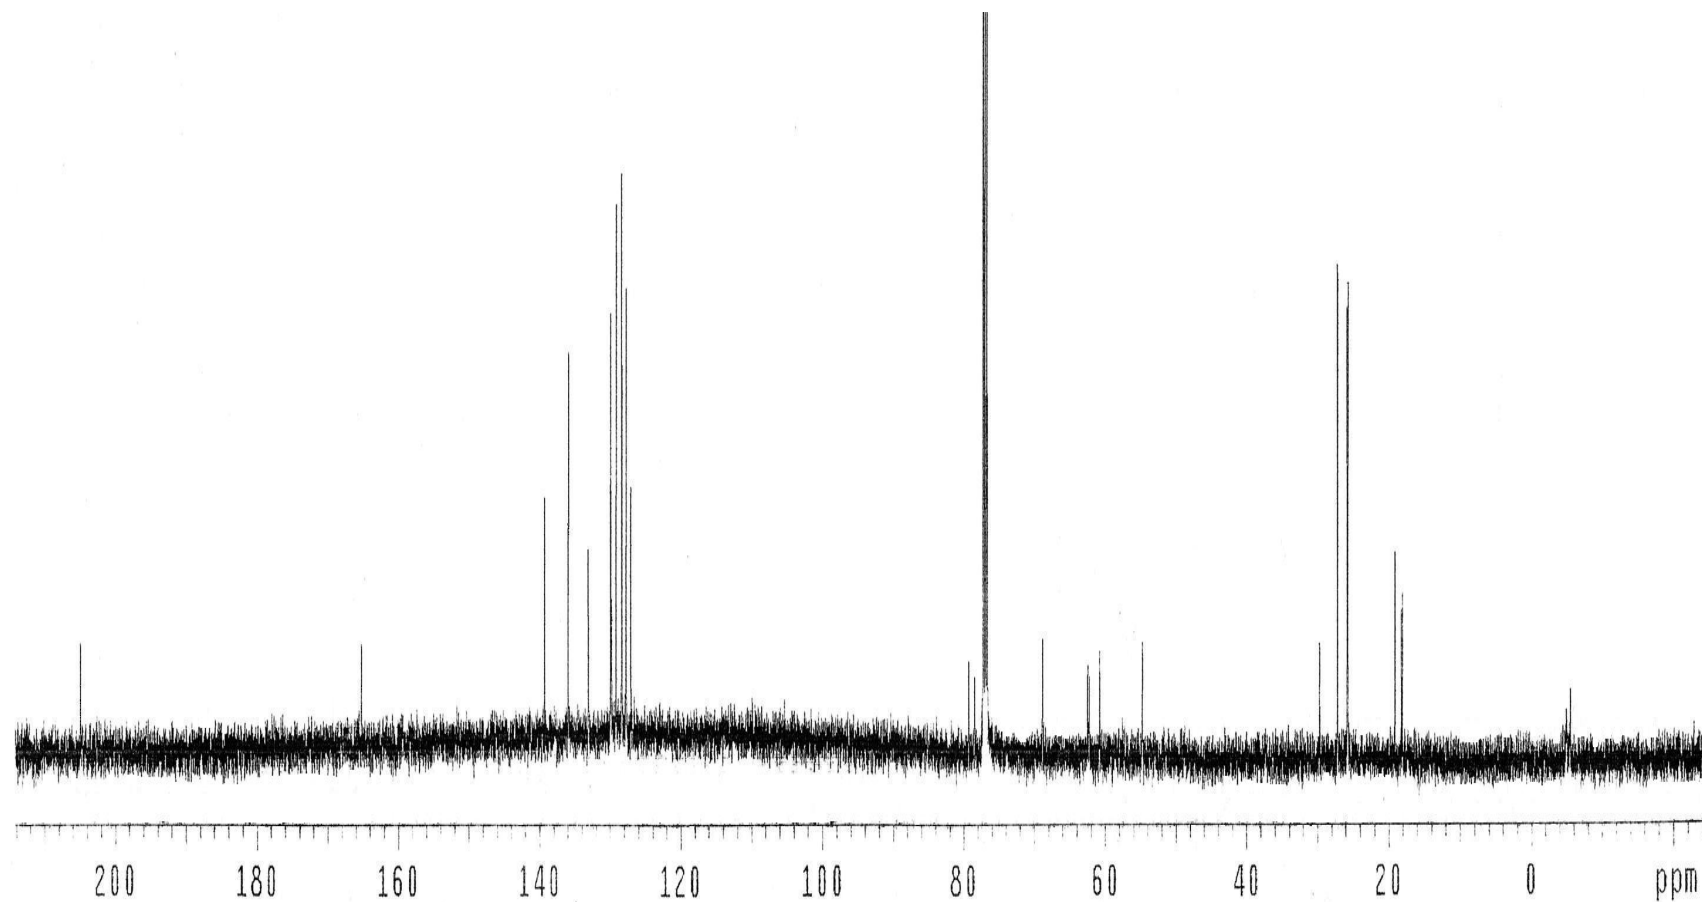

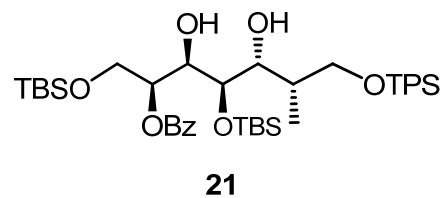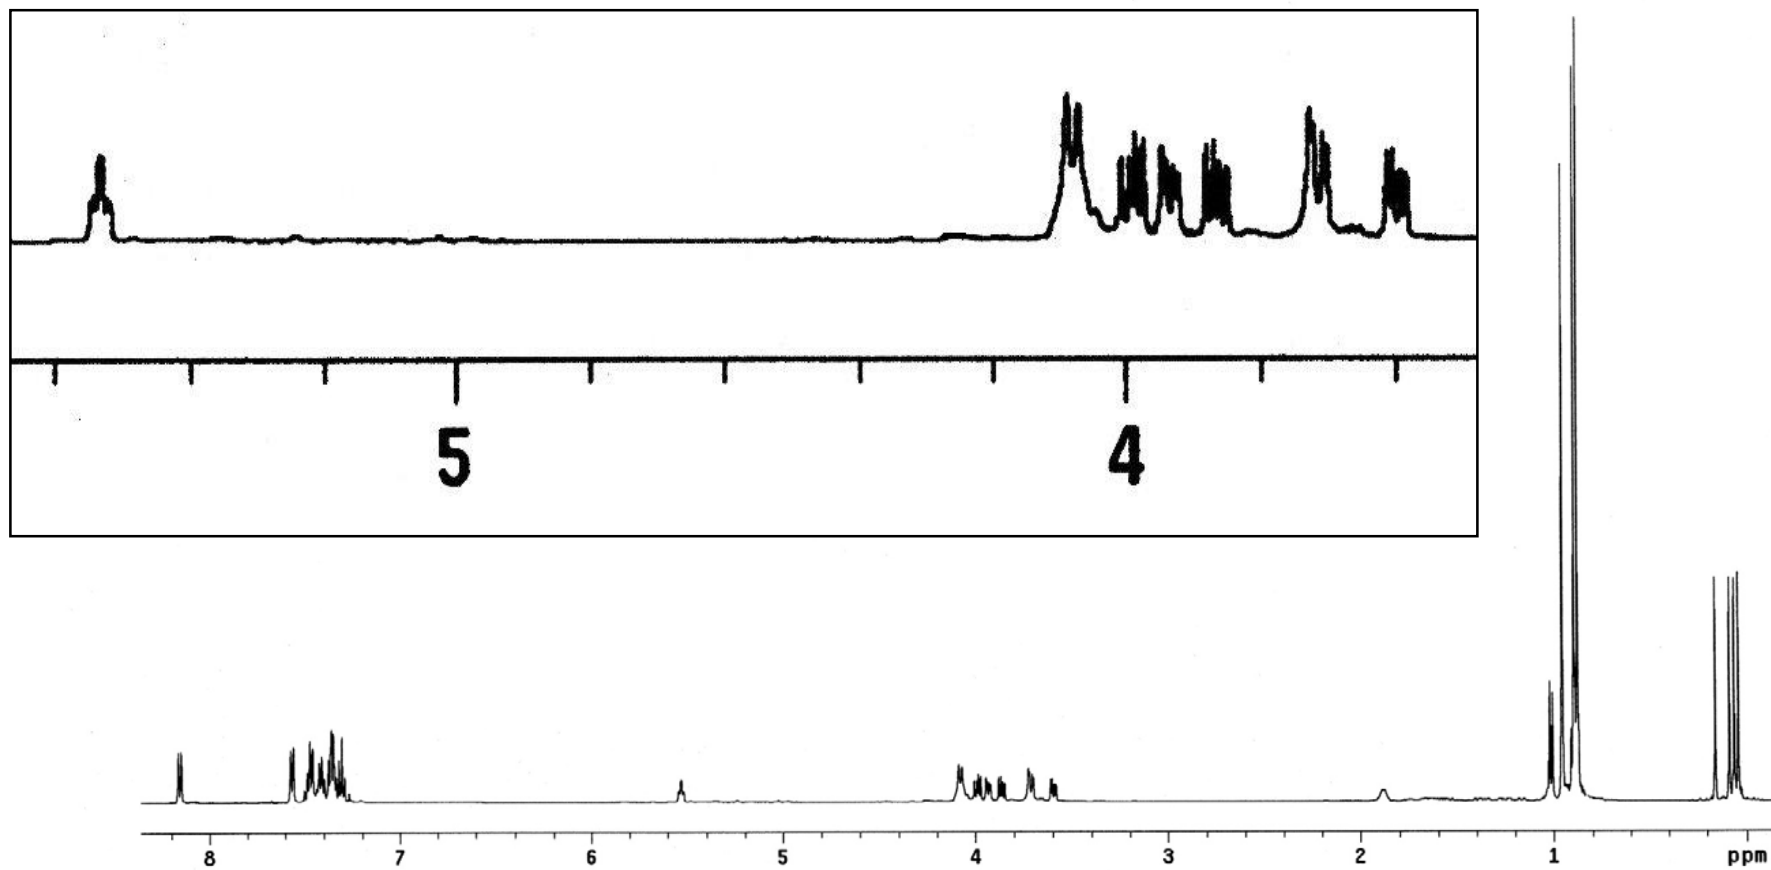

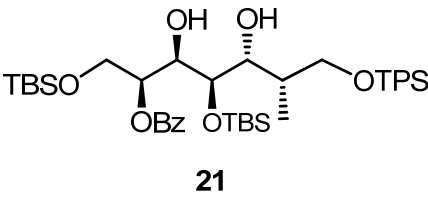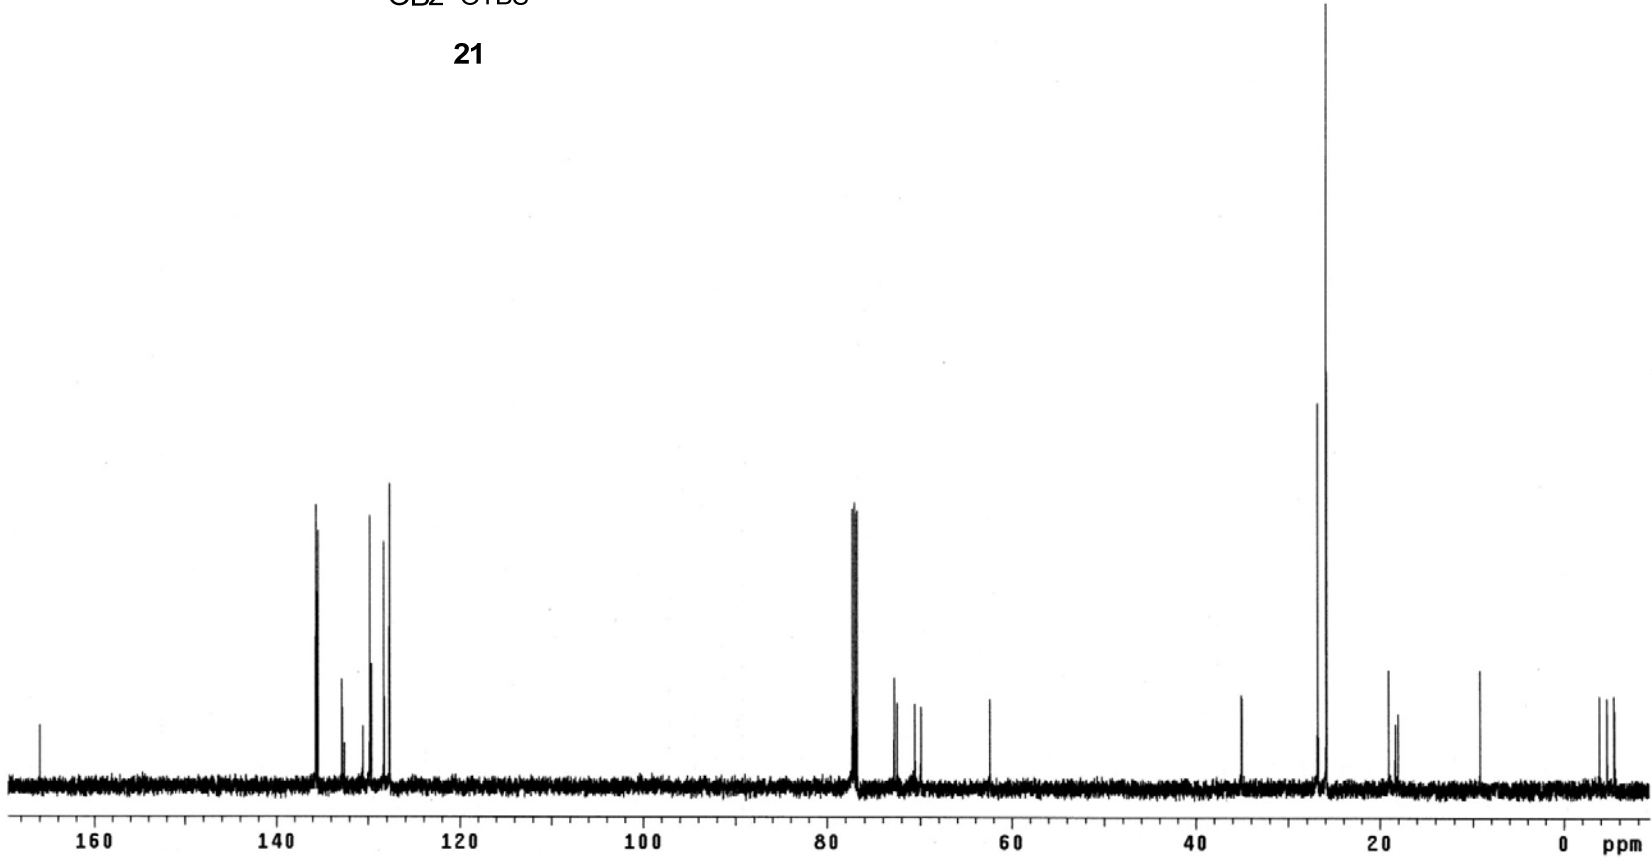

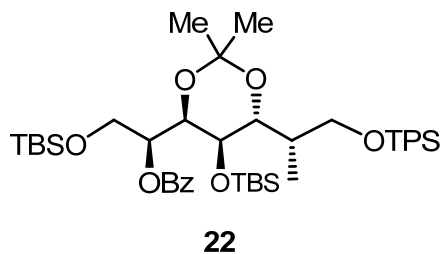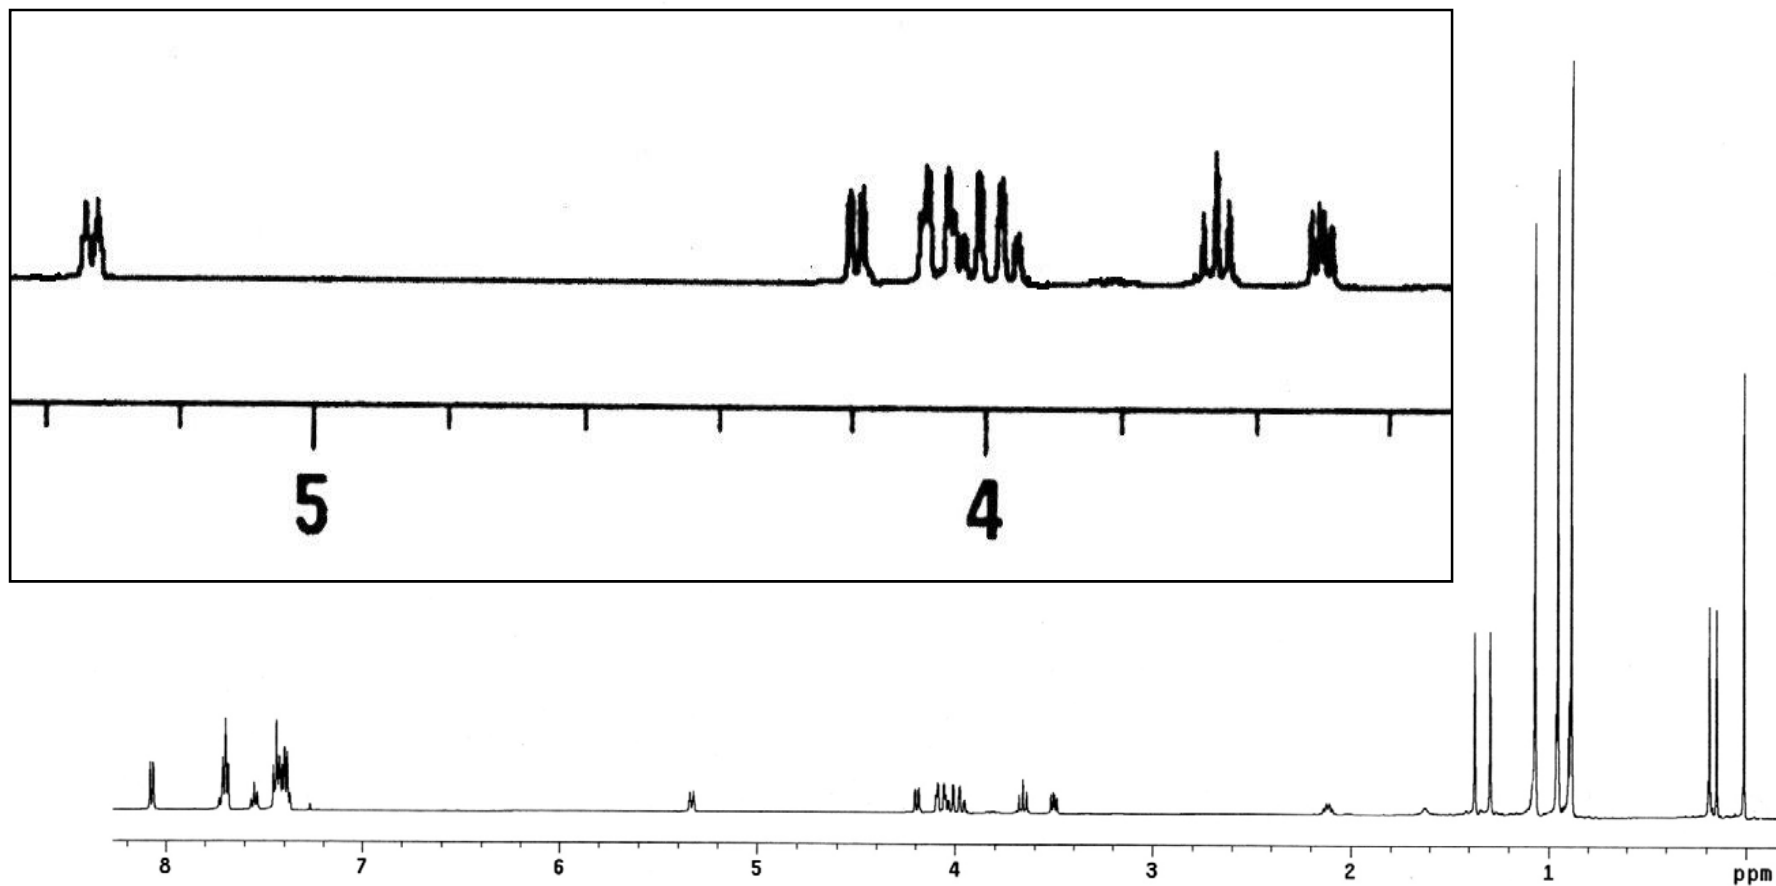



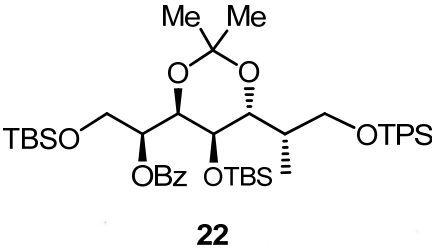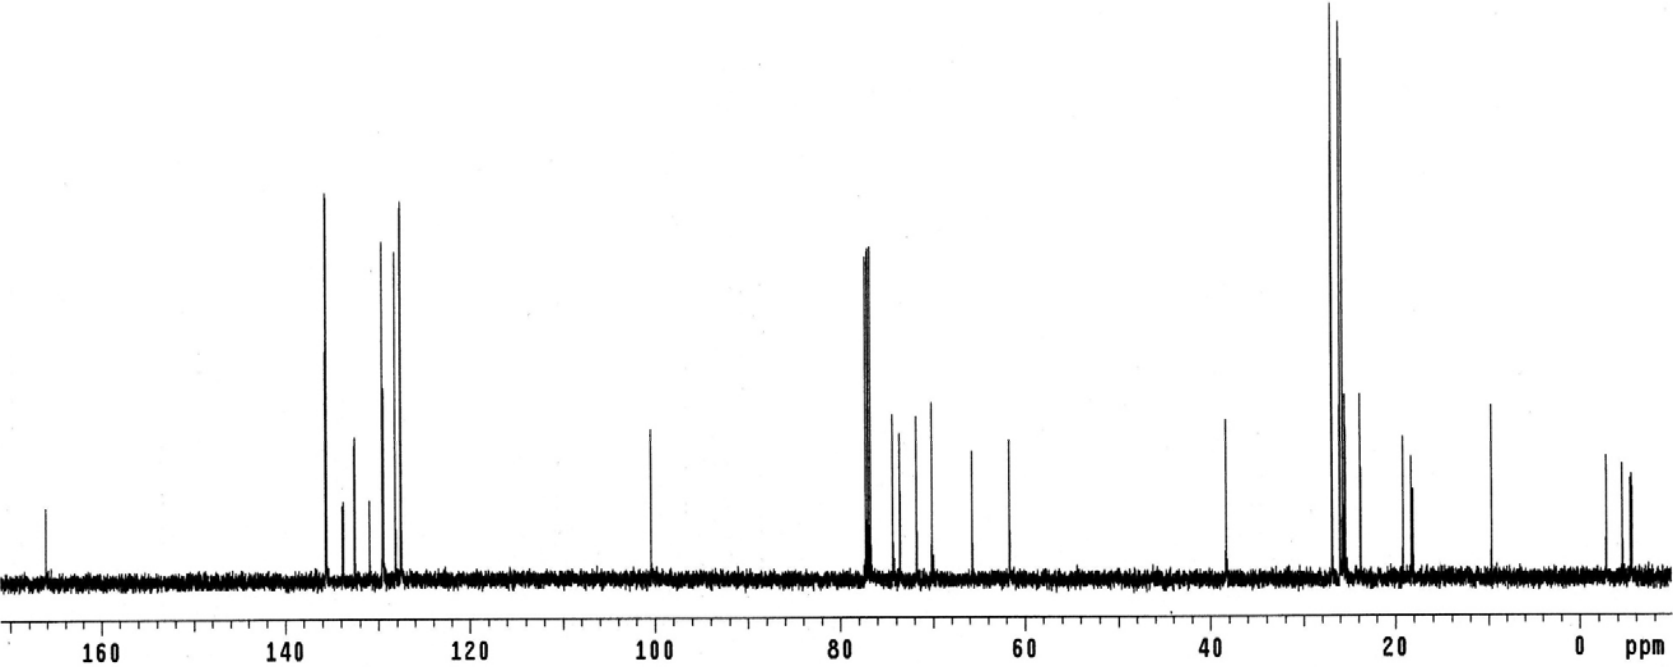

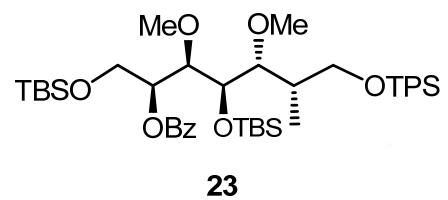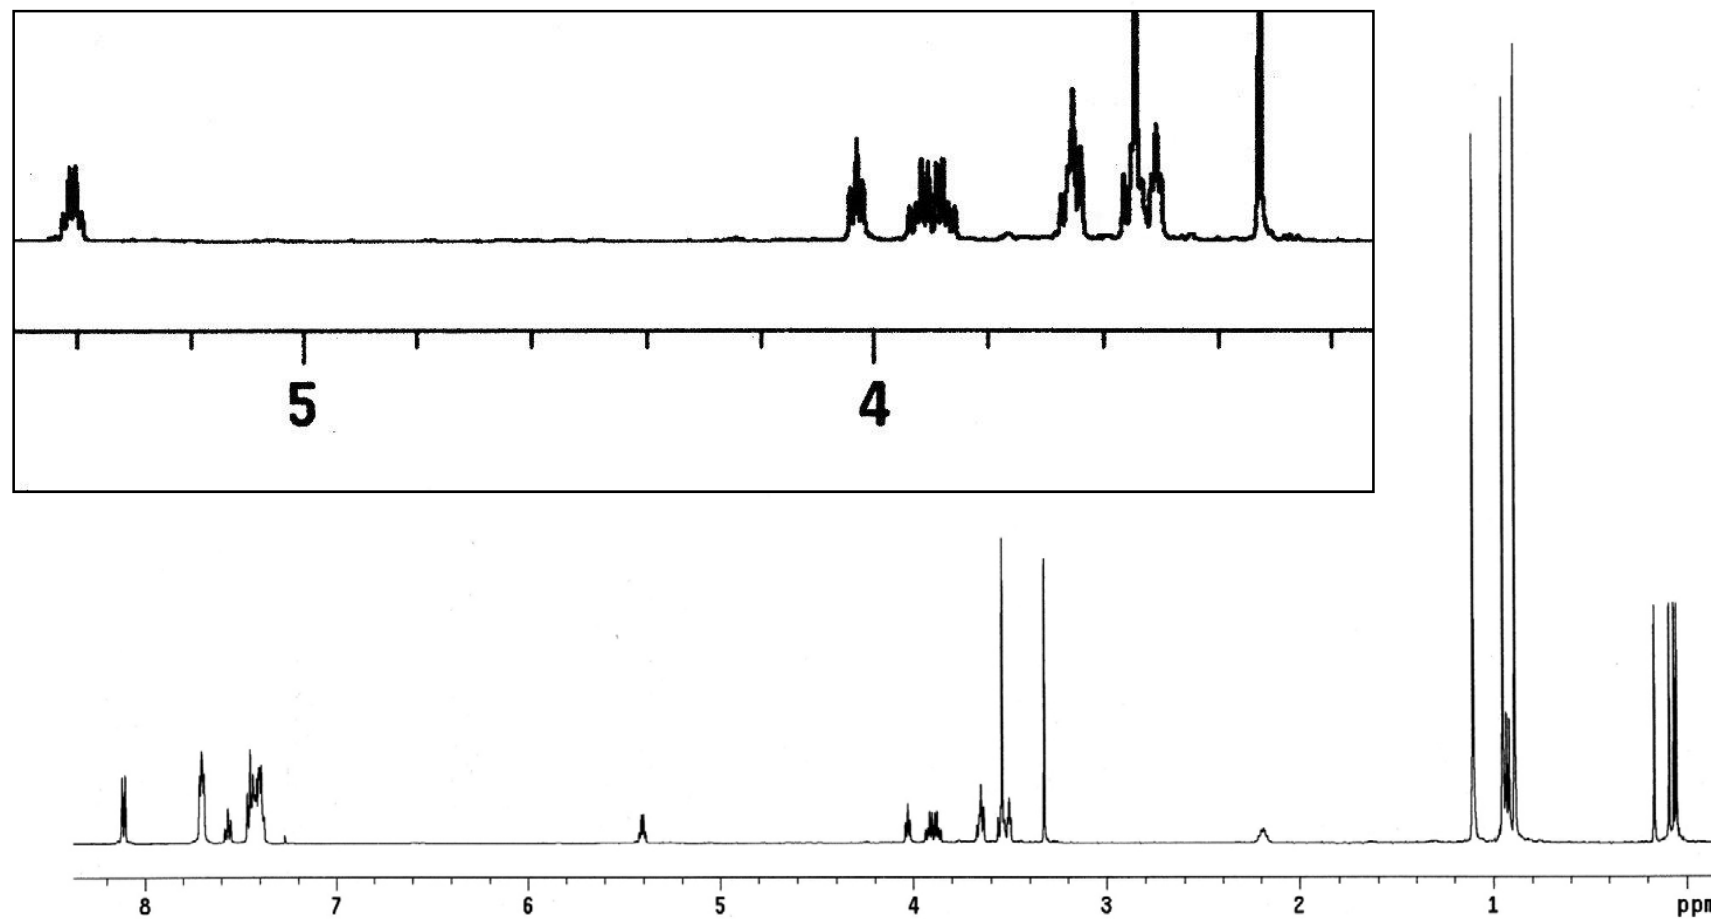

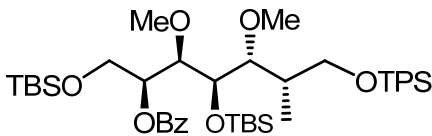

23

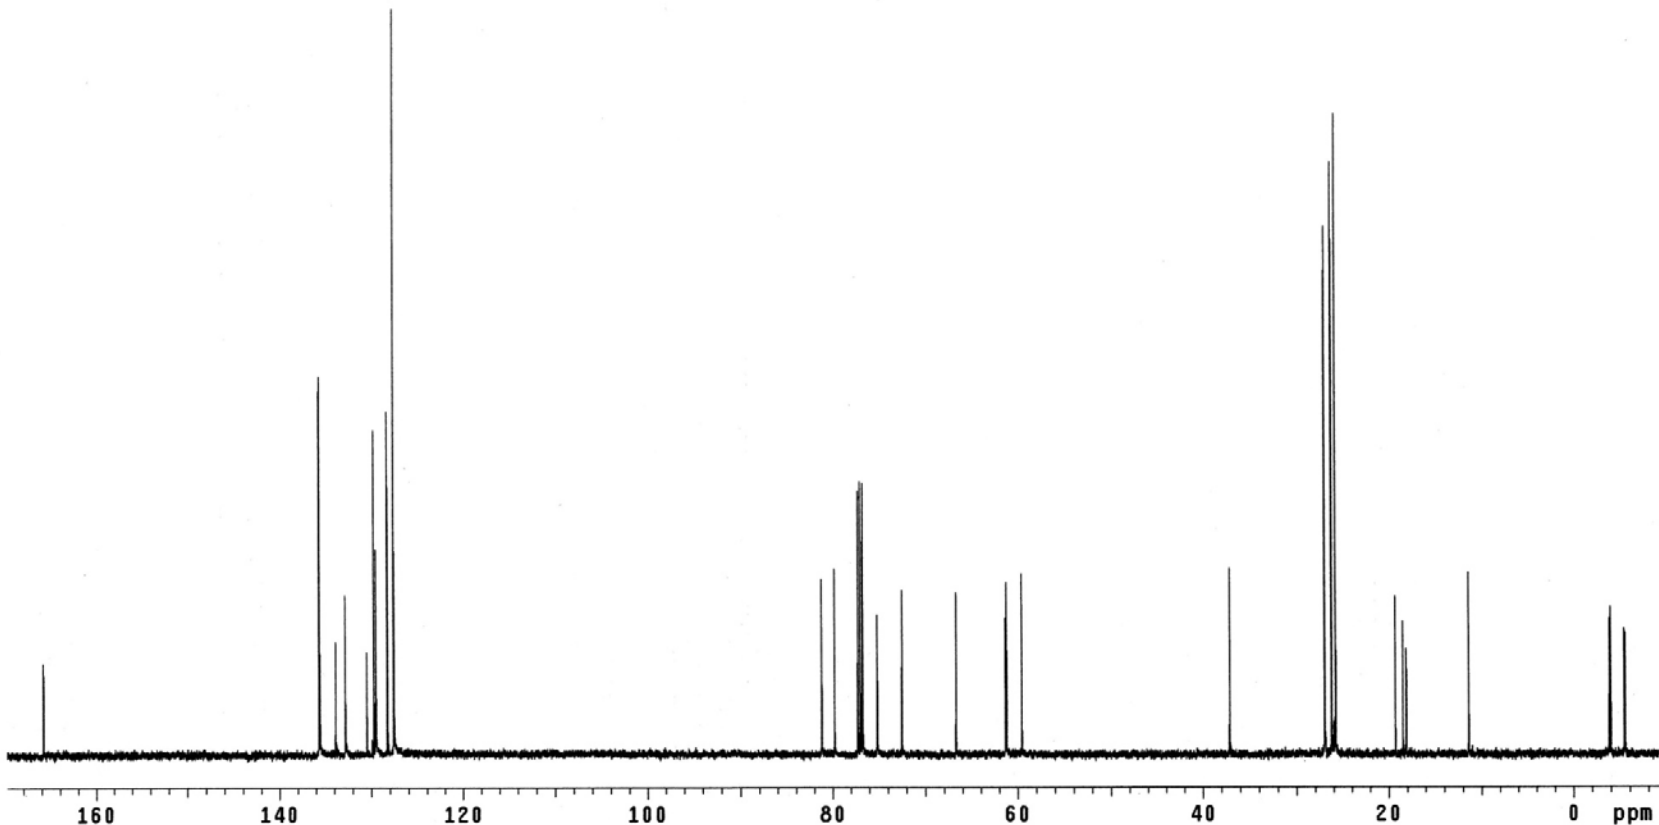

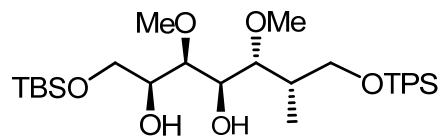

24

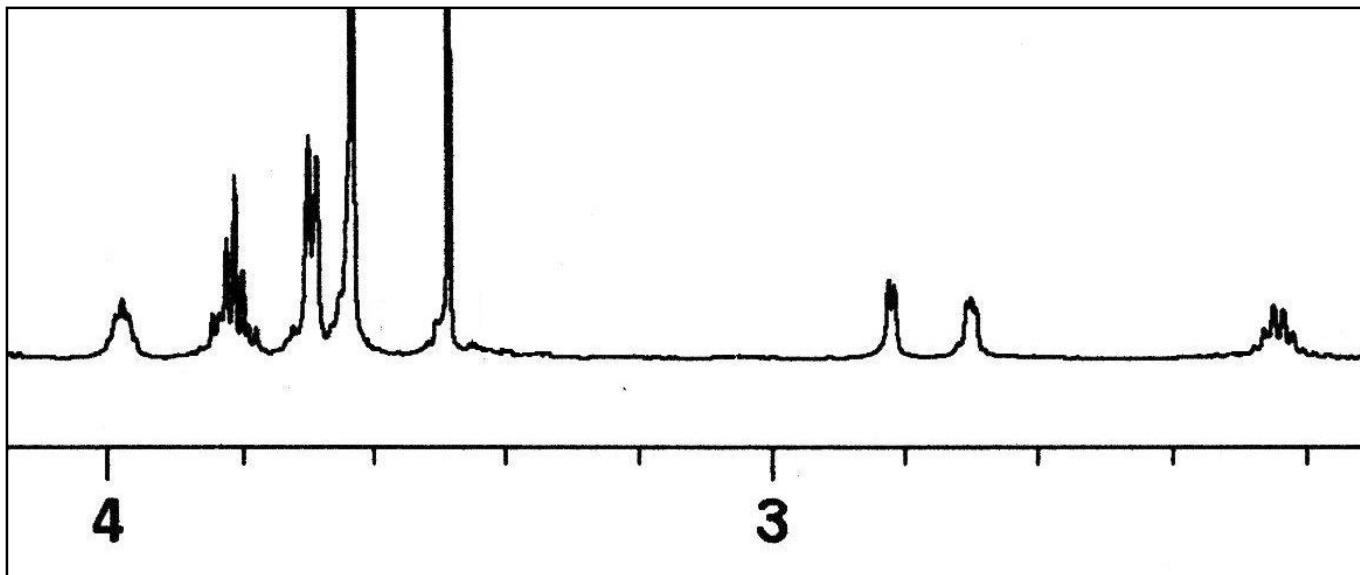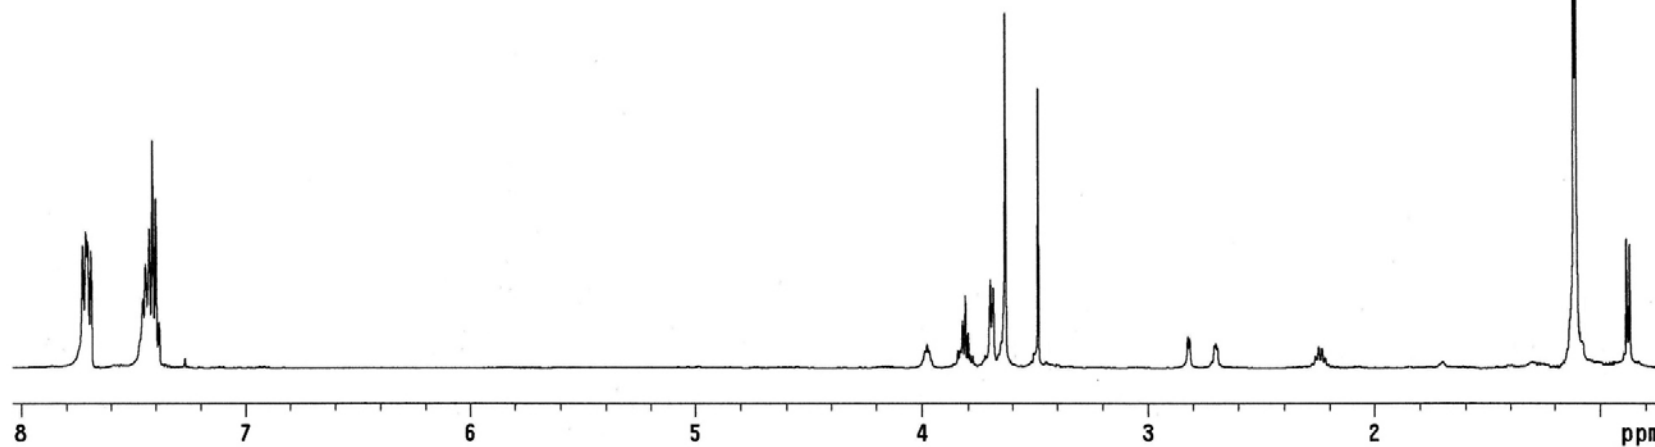

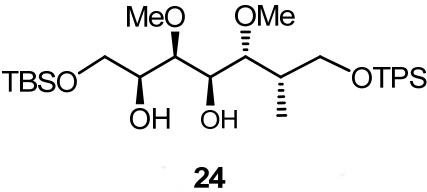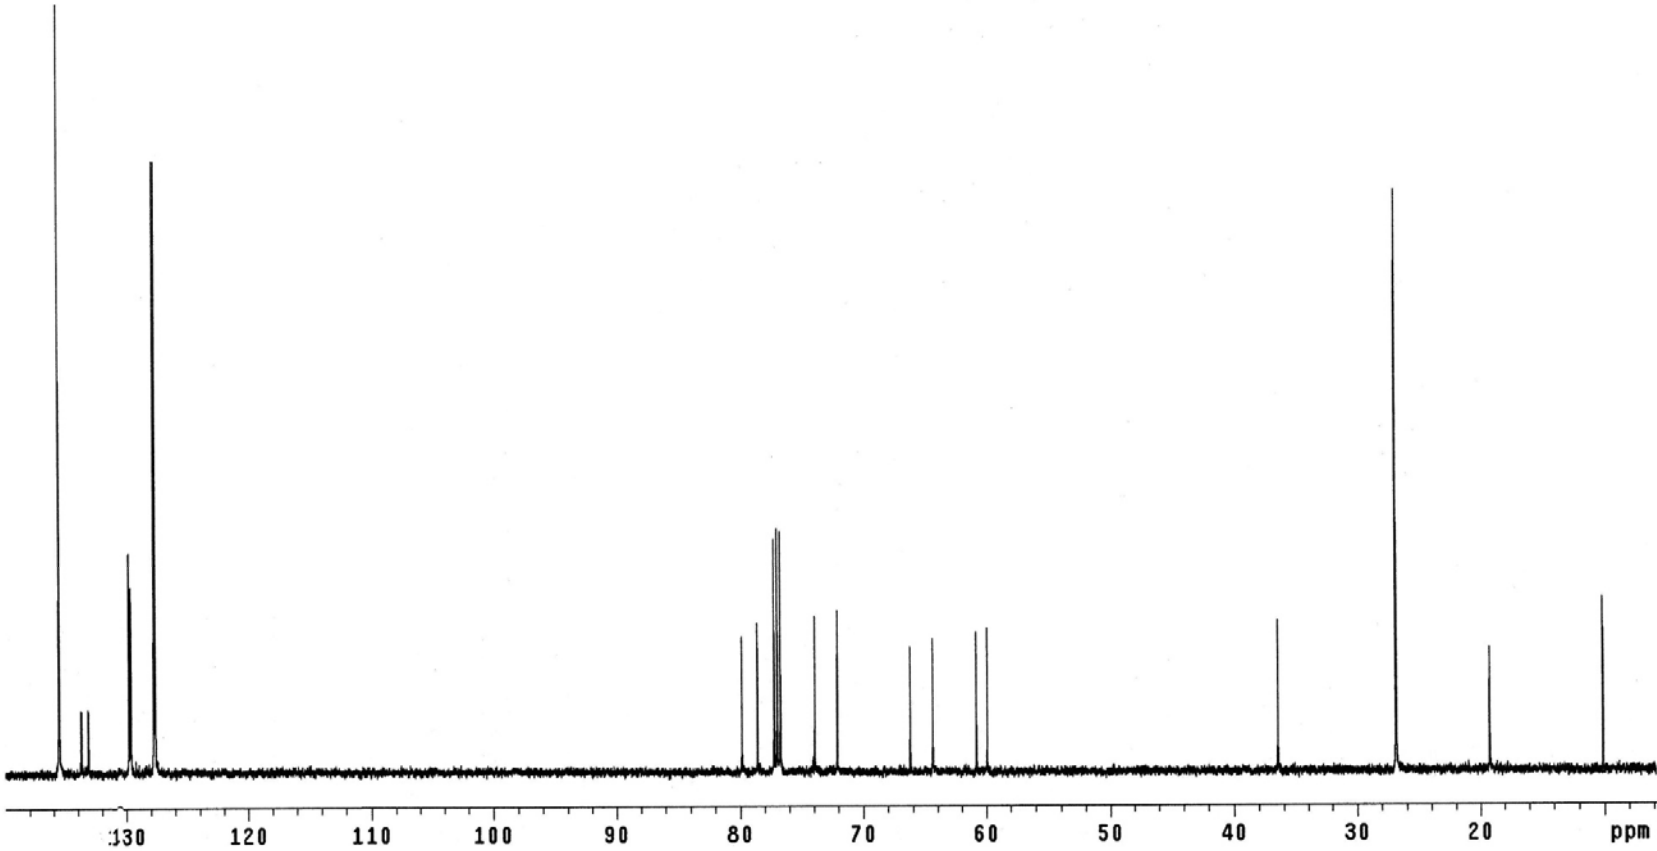

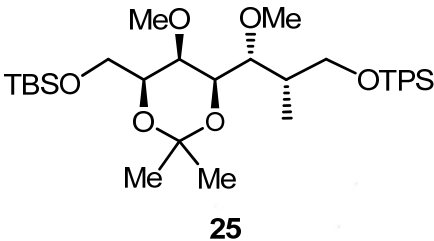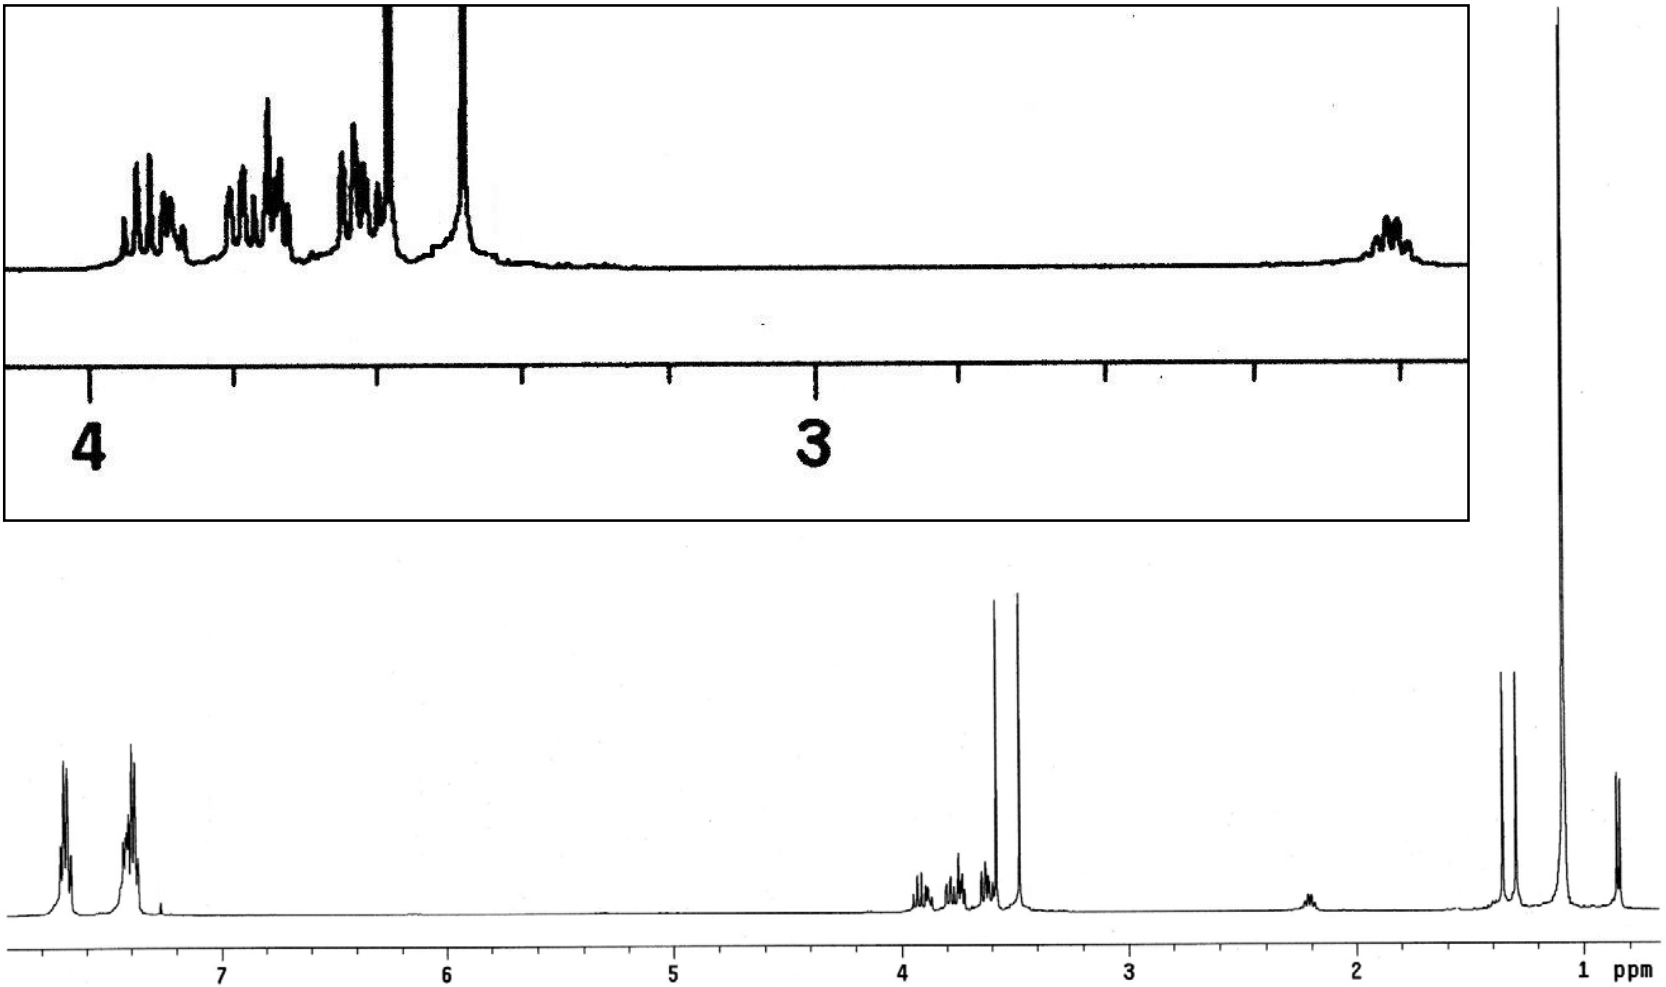

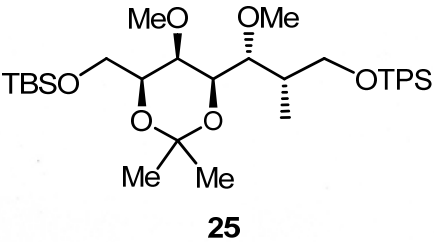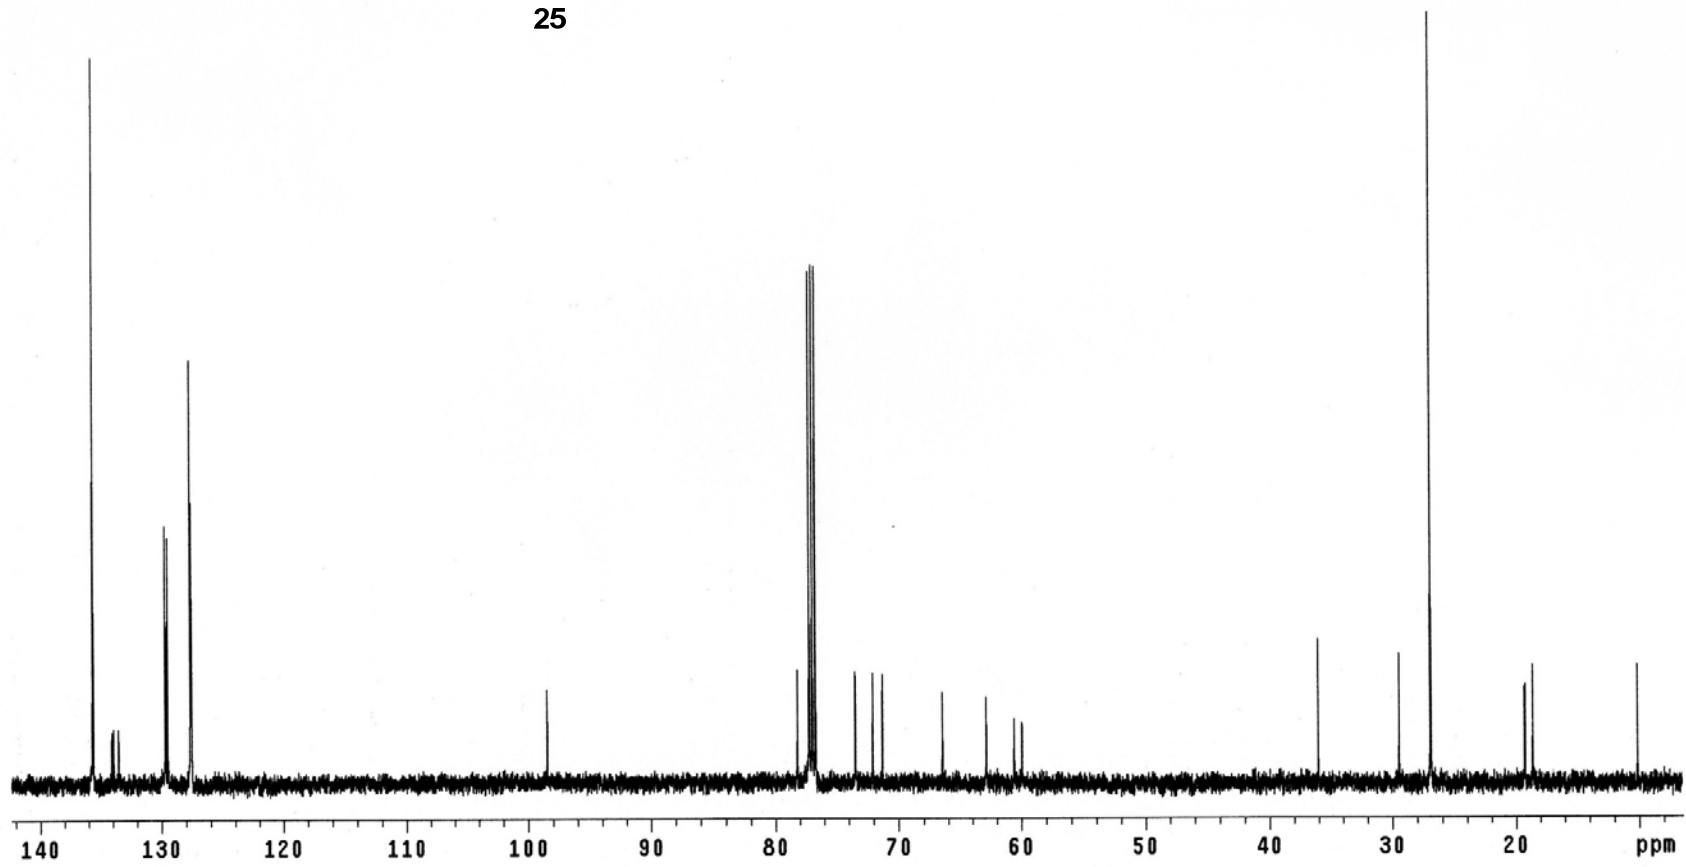

Supplement: c2ob25803j_2.pdf [file c2ob25803j_2.pdf]
